# Supplementary material for: Life stage-specific trends in educational inequalities in health-related quality of life and self-rated health between 2002 and 2016 in Germany: findings from the German Socio-Economic Panel Study (GSOEP)
Source: PubMed Central journal article supplement — BMJ Open. 2021 Mar 4;11(3):e042017. doi: 10.1136/bmjopen-2020-042017 (PMC7934728; doi:10.1136/bmjopen-2020-042017), 2021-03-04
Supplement: bmjopen-2020-042017.draft_revisions.pdf [file bmjopen-2020-042017.draft_revisions.pdf]

# BMJ Open

BMJ Open is committed to open peer review. As part of this commitment we make the peer review history of every article we publish publicly available.

When an article is published we post the peer reviewers' comments and the authors' responses online. We also post the versions of the paper that were used during peer review. These are the versions that the peer review comments apply to.

The versions of the paper that follow are the versions that were submitted during the peer review process. They are not the versions of record or the final published versions. They should not be cited or distributed as the published version of this manuscript.

BMJ Open is an open access journal and the full, final, typeset and author-corrected version of record of the manuscript is available on our site with no access controls, subscription charges or pay-per-view fees (<http://bmjopen.bmj.com>).

If you have any questions on BMJ Open's open peer review process please email [info.bmjopen@bmj.com](mailto:info.bmjopen@bmj.com)

# BMJ Open

## Life stage-specific trends in educational inequalities in health-related quality of life and self-rated health between 2002 and 2016 in Germany – Findings from the German Socioeconomic Panel Study (GSOEP)

|                               |                                                                                                                                                                                                                                                                                                                                                                                                            |
|-------------------------------|------------------------------------------------------------------------------------------------------------------------------------------------------------------------------------------------------------------------------------------------------------------------------------------------------------------------------------------------------------------------------------------------------------|
| Journal:                      | <i>BMJ Open</i>                                                                                                                                                                                                                                                                                                                                                                                            |
| Manuscript ID                 | bmjopen-2020-042017                                                                                                                                                                                                                                                                                                                                                                                        |
| Article Type:                 | Original research                                                                                                                                                                                                                                                                                                                                                                                          |
| Date Submitted by the Author: | 23-Jun-2020                                                                                                                                                                                                                                                                                                                                                                                                |
| Complete List of Authors:     | Sperlich, Stefanie; Hannover Medical School, Medical Sociology<br>Klar, Marie; Hannover Medical School, Medical Sociology<br>Safieddine, Batoul; Hannover Medical School, Medical Sociology<br>Tetzlaff, Fabian; Hannover Medical School, Medical Sociology<br>Tetzlaff, Juliane; Hannover Medical School, Medical Sociology<br>Geyer, Siegfried; Medizinische Hochschule Hannover, Medical Sociology Unit |
| Keywords:                     | EPIDEMIOLOGY, PUBLIC HEALTH, SOCIAL MEDICINE                                                                                                                                                                                                                                                                                                                                                               |
|                               |                                                                                                                                                                                                                                                                                                                                                                                                            |

SCHOLARONE™  
Manuscripts

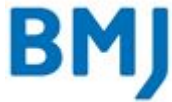

I, the Submitting Author has the right to grant and does grant on behalf of all authors of the Work (as defined in the below author licence), an exclusive licence and/or a non-exclusive licence for contributions from authors who are: i) UK Crown employees; ii) where BMJ has agreed a CC-BY licence shall apply, and/or iii) in accordance with the terms applicable for US Federal Government officers or employees acting as part of their official duties; on a worldwide, perpetual, irrevocable, royalty-free basis to BMJ Publishing Group Ltd ("BMJ") its licensees and where the relevant Journal is co-owned by BMJ to the co-owners of the Journal, to publish the Work in this journal and any other BMJ products and to exploit all rights, as set out in our [licence](#).

The Submitting Author accepts and understands that any supply made under these terms is made by BMJ to the Submitting Author unless you are acting as an employee on behalf of your employer or a postgraduate student of an affiliated institution which is paying any applicable article publishing charge ("APC") for Open Access articles. Where the Submitting Author wishes to make the Work available on an Open Access basis (and intends to pay the relevant APC), the terms of reuse of such Open Access shall be governed by a Creative Commons licence – details of these licences and which [Creative Commons](#) licence will apply to this Work are set out in our licence referred to above.

Other than as permitted in any relevant BMJ Author's Self Archiving Policies, I confirm this Work has not been accepted for publication elsewhere, is not being considered for publication elsewhere and does not duplicate material already published. I confirm all authors consent to publication of this Work and authorise the granting of this licence.

1  
2  
3 **Life stage-specific trends in educational inequalities in health-related quality of life and**  
4 **self-rated health between 2002 and 2016 in Germany –**  
5 **Findings from the German Socioeconomic Panel Study (GSOEP)**  
6  
7

8 *Stefanie Sperlich<sup>1</sup>, Marie Kristin Klar<sup>1</sup>, Fabian Tetzlaff<sup>1</sup>, Juliane Tetzlaff<sup>1</sup>, Batoul Safieddine<sup>1</sup>,*  
9 *Siegfried Geyer<sup>1</sup>*  
10

11 <sup>1</sup> Hannover Medical School, Medical Sociology, Hannover, Germany  
12  
13  
14  
15

16 Corresponding author:

17 Stefanie Sperlich  
18 Carl-Neuberg Str. 1  
19 30625 Hannover  
20 Tel. 0049 511 532 9310  
21 Fax 0049 511 532 4214  
22 email: [Sperlich.Stefanie@mh-hannover.de](mailto:Sperlich.Stefanie@mh-hannover.de)  
23  
24  
25

26 Email of the other authors:

27 [marie-k.klar@gmx.de](mailto:marie-k.klar@gmx.de)  
28 [Safieddine.Batoul@mh-hannover.de](mailto:Safieddine.Batoul@mh-hannover.de)  
29 [Tetzlaff.Fabian@mh-hannover.de](mailto:Tetzlaff.Fabian@mh-hannover.de)  
30 [Tetzlaff.Juliane@mh-hannover.de](mailto:Tetzlaff.Juliane@mh-hannover.de)  
31 [Geyer.Siegfried@mh-hannover.de](mailto:Geyer.Siegfried@mh-hannover.de)  
32  
33

34 Word count  
35 Abstract: 285  
36 Manuscript: 4586  
37  
38  
39  
40  
41  
42  
43  
44  
45  
46  
47  
48  
49  
50  
51  
52  
53  
54  
55  
56  
57  
58  
59  
60

## ABSTRACT

**Objectives** While evidence suggests persisting health inequalities, research on whether these trends may vary according to different stages of life has rarely been considered. Against this backdrop, we analyzed life stage-specific trends in educational inequalities in health-related quality of life (HRQOL) and poor self-rated health (SRH) for individuals in ‘later working life’ (50-64 years), ‘young seniors’ (65-79 years) and persons of ‘old age’ (80+ years).

**Methods** We used survey data from the German Socio-Economic Panel Study comprising the period from 2002 to 2016. The sample consists of 26,074 respondents (160,888 person years) aged 50 years and older. Health was assessed using the mental and physical component summary scale (MCS / PCS) of the HRQOL questionnaire (SF-12v2) and the single item self-rated health. To estimate educational health inequalities, we calculated the regression-based slope index of inequality (SII) and relative index of inequality (RII). Time trends in inequalities were assessed by the inclusion of a two-way interaction term between school education and time.

**Results** With increasing age, educational inequalities in PCS and poor SRH decreased whereas they rose in MCS. Among young seniors, health inequalities decreased in men (MCS<sub>SII</sub>=2.76, p<0.05; MCS<sub>RII</sub>=1.05, p<0.05; PCS<sub>SII</sub>=2.12, p<0.10; PCS<sub>RII</sub>=1.05, p<0.10; poor SRH<sub>SII</sub>=-0.10, p<0.05; poor SRH<sub>RII</sub>=0.73, p>0.10) and among women for MCS (MCS<sub>SII</sub>=2.82, p<0.05; MCS<sub>RII</sub>=1.06, p<0.05). In contrast, health inequalities widened in the ‘later working life’ among women (PCS<sub>SII</sub>=-2.98, p<0.01; PCS<sub>RII</sub>=0.94, p<0.05; poor SRH<sub>SII</sub>=0.07, p<0.05; poor SRH<sub>RII</sub>=1.32, p<0.10) while remained largely stable at old age for both genders.

**Conclusions** We found distinctive patterns of health inequality trends depending on the life stage. Our findings highlight the importance to differentiate between life stages when analyzing the temporal development of health inequality and to pursue research that explores the mechanisms contributing to these differences.

**Keywords:** health inequality, life stages, trend, temporal change

### Strengths and limitations of this study

- This is one of the first studies investigating trends in educational inequalities in HRQOL and poor SRH according to different stages of life
- We used data from a large nationally representative survey, and our study considered trends over a period of 15 years using a validated measure of HRQOL
- The key finding of life stage-specific trends in educational inequality in health are open to different interpretation and might be the result of cohort- as well as period-effects.
- Further studies are warranted in order to replicate our findings and to provide clues to the drivers behind the life stage-specific trends.

## INTRODUCTION

Indicators of subjective health like self-rated health (SRH) and health-related quality of life (HRQOL) complement mortality and morbidity as measures used in tracking trends in population health<sup>1</sup>. Previous studies on temporal change in subjective health have shown conflicting results indicating both improvements<sup>2-4</sup> as well as stable trends or even deterioration of self-rated health over time.<sup>5-7</sup> Similarly, recent studies in Germany revealed heterogeneous findings with some suggesting that the prevalence of poor SRH did not change substantially over time<sup>8 9</sup> while others pointing towards enhancements in HRQOL and functional health.<sup>10 11</sup>

The existence of socioeconomic inequalities in mortality and morbidity is well documented<sup>12-14</sup> and the social gradient in health has also been shown to be present for SRH and HRQOL.<sup>15 16</sup> Recent studies from Europe and other western countries indicate that the self-rated health gap between lower and higher socioeconomic status (SES) groups remained largely unchanged or has even widened over time.<sup>17-19</sup> A similar pattern was observed for Germany where trends in self-rated health point towards persisting absolute and relative health inequalities.<sup>8 9 20</sup> The life-course perspective on social inequalities in health suggests that while social disparities persist across the life course, the magnitude of these differences may vary according to the stage in the life phase. Three opposing theoretical perspectives have been proposed about the way in which health inequality may evolve across the life course. The *cumulative advantage/disadvantage hypothesis* claims that the positive effect of SES on health increases over the life course and therefore health inequality would widen at older ages.<sup>21</sup> In contrast, the *status maintenance hypothesis* states that the social health gradient remains largely constant across the life course since the social positions attained in early adulthood do not substantially change in later life.<sup>22</sup> Finally, the *age-as-leveler hypothesis* posits that health inequality decreases at older ages due to different factors such as the selection of more healthy people due to mortality.<sup>23</sup> Previous studies revealed contradictory findings supporting the cumulative advantage/disadvantage hypothesis,<sup>24 25</sup> as well as the status maintenance<sup>25 26</sup> and the age-as-leveler<sup>27</sup> assumptions.

Whereas numerous studies on social inequalities in health have adopted a life course approach<sup>28 29</sup>, a life stage-specific perspective on determinants of health inequalities has so far been neglected. In one of the few existing studies, San Sebastian et al.<sup>30</sup> analyzed the effects of social determinants in health at four different life stages. They found that the effects of specific adversities depend on the life course stage and concluded that life course needs to be

1  
2  
3 taken into consideration for tackling health inequalities. In a similar vein, recent studies  
4 suggest that the temporal trends in SRH and functional disability also differ according to the  
5 life stage considered.<sup>31-35</sup> Previous research on trends in social inequality in health has mainly  
6 focused on the entire adult population and has not adequately taking into consideration that  
7 health trends may vary across different stages of life. Using this as a starting-point, the aim of  
8 this study was to analyze time trends in educational inequalities in HRQOL and poor SRH for  
9 individuals in their ‘later working life’ (50-64 years), ‘young seniors’ (65-79 years) and  
10 persons of ‘old age’ (80+ years). In more detail, the study was guided by the following  
11 research questions:

- 12 1. Does the extent of educational inequalities in HRQOL and poor SRH vary between  
13 different life stages?
- 14 2. How are HRQOL and poor SRH evolving over time in each of the life stages  
15 according to educational level?
- 16 3. Are there diverging trends of educational inequalities in health for the different life  
17 stages?

## 32 **METHODS**

33 Our paper follows the “Strengthening the Reporting of Observational Studies in  
34 Epidemiology (STROBE)” guidelines.<sup>36</sup>

### 39 **Data source**

40 This study is based on data from the German Socio-Economic Panel Study (GSOEP V.31).  
41 The GSOEP is the largest representative annual survey of German individuals based on a  
42 random sample of private households. Conducted from 1984 onwards the study covers nearly  
43 11,000 households and 30,000 individuals each year. The GSOEP population is regularly  
44 updated with new survey samples to account for changes in the German population and for  
45 compensating loss-to-follow-up. Data were collected using different questionnaires for  
46 individuals, households or specific subgroups by face-to-face interviews. Further information  
47 on GSOEP can be derived from Frick et al.<sup>37</sup> The information used for this study includes  
48 school education, income, marital status, nationality as well as SRH and HRQOL as health  
49 outcomes. While SRH was assessed annually, HRQOL has been measured every two years  
50 since 2002. We focused on men and women aged 50 and above since limitations in physical  
51 wellbeing are rare in younger subjects.  
52  
53  
54  
55  
56  
57  
58  
59  
60



1  
2  
3 For the physical and the mental components of HRQOL, in total 23,878 respondents (11,553  
4 men / 12,325 women) were observed 81,676 times (39,159 men / 42,517 women) between  
5 2002 and 2016, corresponding to an average participation in 3.4 waves (min. = 1/ max. = 8).  
6  
7 With respect to SRH, a total of 26,074 respondents (12,665 men / 13,409 women) were  
8 observed 160,888 times (77,028 men / 83,860 women), corresponding to an average  
9 participation in 6.1 waves in men and 6.3 in women (min. = 1/ max. = 15). According to our  
10 life stage-approach, we assigned the population to three different life stages, namely 'later  
11 working life' (50-64 years), 'young seniors' (65-79 years) and 'old age' (80+ years). We used  
12 cross-sectional weights which are assumed to produce a nationally representative sample.<sup>38</sup>  
13 The proportion of missing values varied between 0 and 2.6%. Respondents with missing  
14 information were excluded from analysis (Table 1).  
15  
16  
17  
18  
19  
20  
21  
22  
23

## 24 Measures

### 25 *Self-rated health (SRH)*

26 SRH is one of the most frequently used health measures in public health and has been proved  
27 to be a reliable indicator of healthcare services utilization<sup>39</sup>, functional limitations<sup>40</sup> and  
28 mortality.<sup>39 41</sup> In our study, SRH was measured by the question "How would you assess your  
29 current state of health?" comprising the five response categories: 'very good', 'good',  
30 'satisfactory', 'poor' and 'bad'. The responses were dichotomized into 'poor health' (last two  
31 categories) and better health (first three categories).  
32  
33  
34  
35  
36  
37  
38  
39  
40

### 41 *Health-related quality of life (HRQOL)*

42 HRQOL is a multidimensional concept that incorporates physical, emotional and social  
43 dimensions of health.<sup>42</sup> In this study, HRQOL was assessed using a slightly modified version  
44 of the second version of the 12-Item Short Form Health Survey (SF-12v.2).<sup>43</sup> The SF-12v.2  
45 includes 12 items making up eight scales: physical functioning, role limitations due to  
46 physical problems, bodily pain, general health, vitality, social functioning, role limitation due  
47 to emotional problems and perceived mental health. Based on these items a physical  
48 component summary (PCS) score and a mental component summary (MCS) score were  
49 calculated. Values are standardized to a national norm (GSOEP population in 2004) ranging  
50 from 0 to 100 points with a mean of 50 points and a standard deviation of 10 points. A higher  
51 score corresponds to a better health status.  
52  
53  
54  
55  
56  
57  
58  
59  
60

### *Education*

Educational level was classified into 'low', 'intermediate' and 'high' according to the number of years of schooling. All individuals with a maximum of nine years of schooling (secondary education) were assigned to the low educational group that includes also subjects without school leaving certificate. The intermediate education group consists of those with 10 years of schooling corresponding to a comprehensive school certificate. Subjects with at least twelve years' schooling were assigned to the high educational group corresponding to German secondary school leaving certificate. For analyzing time trends, these educational groups were transformed into cumulative rank probabilities (ridit scores).

### *Time trend*

Changes in SRH and HRQOL between 2002 and 2016 were assessed by a continuous time-trend variable with a range of 0 to 1 for the entire study period. The first year of observation (2002) is coded as 0 and the last year (2016) as 1, with the years in between getting fractional values according to the following formula:  $[(\text{year}-2002) / (2016-2002)]$ .

### *Confounders*

Socio-demographic characteristics such as migration background, marital status and income level might be correlated with health outcomes as well as educational level. Shift in the compositions of these factors due to selective panel attrition might be a possible source of bias for the magnitude of health trends observed. Hence, in all analyses we adjusted for nationality, marital status and equivalized net income. To take account of possible shifts in age composition over time within the three life stages, we additionally adjusted for age in each of the models.

### *Statistical analysis*

We performed logistic and linear regression models to test for time-effects on poor SRH and HRQOL, respectively. We accommodated the statistical dependence among the repeated observations by calculating population-averaged effects using generalized equation estimating (GEE) for logistic and linear regression.<sup>44</sup> We used this regression technique since our aim was to analyze population-averaged and not subject-specific time-effects which would be more accurately estimated by random-effect models.<sup>45</sup> In addition to odds ratios (OR) we

1  
2  
3 reported predicted means and probabilities (margins at means) giving the time trends a more  
4 substantial interpretation.  
5

6 We calculated the Relative Index of Inequality (RII) and the Slope Index of Inequality (SII) as  
7 recommended by Mackenbach and Kunst.<sup>46</sup> These indices are both regression-based and take  
8 the entire distribution of a socio-economic variable as well as the size of the socio-economic  
9 groups into account. In our study, the RII can be interpreted as the estimated ratio (poor SRH:  
10 prevalence ratio, HRQOL: ratio of mean values) between subjects with the lowest and those  
11 with the highest educational level. In contrast, the SII quantifies the magnitude of absolute  
12 health inequality and can be interpreted as the difference in the prevalence (poor SRH) or in  
13 the mean (HRQOL) between individuals at the top and bottom of the educational hierarchy.  
14 To calculate RII and SII, the educational groups of each survey year and for each stage of life  
15 (separated for men and women) were transformed into cumulative rank probabilities ('ridit  
16 scores') ranging from 0 (highest level of education) to 1 (lowest level of education). For  
17 computing the ridit-scores, population weights were employed to match the official  
18 population statistics. As proposed, we used a logarithmic link function to calculate the RII and  
19 an identity link function to calculate the SII by using clustered variance estimators.<sup>46</sup>  
20 Temporal trends in educational inequalities were assessed by the inclusion of a two-way  
21 interaction term between educational levels (ridit-score) and the time-trend variable. The  
22 models were adjusted for possible confounders (see above) and the main effects of education  
23 and time. For MCS and PCS where higher scores reflect better health, values of RII <1 and  
24 SII <0 indicate widening educational inequalities while RII >1 and SII >0 point to decreasing  
25 inequalities over time. The opposite interpretation applies for poor SRH where RII >1 and SII  
26 >0 indicate increasing health inequality over time. All analyses were performed with STATA  
27 v13.1.  
28  
29  
30  
31  
32  
33  
34  
35  
36  
37  
38  
39  
40  
41  
42  
43  
44  
45

## 46 RESULTS

47  
48 The weighted sample characteristics, separated by time periods, are presented in Table 1.  
49 Between 2002 and 2016, the proportion of subjects with low educational attainment decreased  
50 while the proportions of those with higher educational levels increased. The distribution of  
51 age, gender, income, nationality and cohabitation remained largely stable over time.  
52  
53

54 Women as compared with men reported consistently lower levels of MCS and PCS as well as  
55 higher proportions of poor SRH at almost each time point (Figure 1 and 2). Subjects in the  
56 later working life showed the highest levels of PCS and lowest proportions of poor SRH.  
57  
58 Health status for these indicators gradually declined in the subsequent life stages with poorest  
59  
60

1  
2  
3 subjective health observed at old age. In contrast, for MCS similar age dependency was not  
4 found in both genders.  
5  
6  
7

### 8 *The extent of educational inequalities in HRQOL and SRH according to life stages*

9  
10 Educational inequalities in mean scores of PCS and proportions of poor SRH to the  
11 disadvantage of lower educated subjects were observed for both genders and all life stages  
12 considered. These inequalities were most pronounced in later working life and declined with  
13 age. In contrast, educational disparities for MCS in both genders were not significant in later  
14 working life but increased with age (Table 2).  
15  
16  
17  
18  
19

### 20 *Health trends in different life stages according to educational level*

21  
22 Among men in the later working life hardly any significant temporal health change was  
23 observed in any of the educational groups. The only exception was that MCS significantly  
24 improved by 1.01 points ( $p<0.05$ ) among men with high educational attainment (Table 3 and  
25 Figure 1). Stronger temporal fluctuations in MCS and PCS were observed in the life stage of  
26 old age, however, no systematic linear health trend was found in any of the educational  
27 groups. By contrast, health in the life stage of young seniors improved more strongly in low  
28 educated as compared with high educated men. This was observed for all of the three health  
29 indicators considered. For example, among low educated men MCS and PCS increased by  
30 1.82 points ( $p<0.001$ ) and 1.56 points ( $p<0.01$ ), respectively, while no significant  
31 improvements were found among high educated men (Table 3). Similar, in men with low  
32 educational level, odds of poor SRH reduced by 31% ( $p<0.001$ ) while declined only by 26%  
33 ( $p<0.01$ ) in their high educated counterparts. Among women, a similar pattern was found,  
34 indicating that subjective health in young seniors increased more pronounced in those with  
35 low as compared to higher educational attainment (Table 3). In later working life, by contrast,  
36 PCS and SRH deteriorated among low educated women while remained largely stable for the  
37 higher educated ones. At this life stage, PCS declined by 1.65 points ( $p<0.001$ ) in low  
38 educated women while slightly improved by 0.36 points ( $p>0.05$ ) in women with high  
39 education. Similarly, odds of poor SRH increased by 33% ( $OR=1.33$ ;  $p<0.05$ ) in low educated  
40 women while marginally decreased by 3% ( $OR=0.97$ ;  $p>0.05$ ) for the high educated ones.  
41 Like in men, at old age no systematic linear health trend was found in any of the educational  
42 groups.  
43  
44  
45  
46  
47  
48  
49  
50  
51  
52  
53  
54  
55  
56  
57  
58  
59  
60

### *Life stage-specific trends in relative (RII) and absolute (SII) educational inequalities*

1  
2  
3 Corresponding to the results of Table 3, no significant change in educational inequalities in  
4 health was found among men in later working life and old age (Table 4). In contrast,  
5 educational inequalities decreased over time among young seniors. As indicated by the  
6 significant interaction terms ( $MCS_{RII} = 1.05 / PCS_{RII} = 1.05$ ), HRQOL improved more strongly  
7 in the lowest as compared with the highest educational group. Expressed in absolute terms  
8 (SII), educational inequalities between the lowest and the highest educational group were  
9 reduced by 2.76 and 2.12 points for MCS and PCS, respectively. The same pattern was found  
10 for poor SRH where the opposite interpretation applies ( $RII < 1$  and  $SII < 0$  indicating  
11 reduction of health inequality), reaching statistical significance for SII only.

12  
13 Educational inequalities among 'young seniors' also decreased in women. However, this was  
14 restricted to MCS where absolute differences between the highest and lowest educational  
15 group were reduced by 2.82 points over time. In accordance with the results of Table 3, the  
16 contrary pattern was found in the life stage of 'later working life' where educational  
17 inequality in women increased in relative and absolute terms for PCS and poor SRH. Similar  
18 to men, no significant change in educational inequalities was observed for the life stage of  
19 'old age'.  
20  
21  
22  
23  
24  
25  
26  
27  
28  
29  
30  
31

## 32 DISCUSSION

33  
34 The aim of this study was to analyze trends in educational inequalities in HRQOL and poor  
35 SRH between 2002 and 2016 in the life stages of 'later working life' (50-64 years), 'young  
36 seniors' (65-79 years) and 'old age' (80+ years). First, we found that educational inequalities  
37 in poor SRH and in the physical component of HRQOL decreased with subsequent life stages  
38 while the opposite applied to the mental component of HRQOL. Our findings suggest that the  
39 way in which health inequality evolves across the life stages depend on the health indicator  
40 considered. This corresponds to previous studies who found different patterns of health  
41 inequalities across ages for different health indicators.<sup>25 47 48</sup> Our main finding was that the  
42 temporal development of health inequality differed according to the stage of life. While  
43 among young seniors health inequalities declined for both genders, a significant increase was  
44 found among women in later working life.  
45  
46  
47  
48  
49  
50  
51  
52  
53

### 54 *The extent of educational inequalities in HRQOL and SRH according to different life stages*

55 In the life stage of 'later working life' no educational inequalities were found for MCS in both  
56 genders. This is in line with the finding by Moor et al.<sup>8</sup> who likewise found no social gradient  
57 in MCS among subjects aged 30 to 49 years. They supposed that this may due to the specific  
58  
59  
60

1  
2  
3 life phase in which career building coincide with family demands, affecting subjects of all  
4 educational levels and thus equalizing educational differences in HRQOL with respect to  
5 mental health. Our findings indicate that educational inequalities in MCS to the disadvantage  
6 of lower educated subjects first emerged at retirement age, supporting the assumption that  
7 during working life, the mental health component of HRQOL is strongly influenced by work-  
8 related demands and time constraints acting independently of educational attainment.  
9 Furthermore, our results suggest that high educated women may benefit more from retirement  
10 age which supports the cumulative advantage/disadvantage hypothesis claiming that the  
11 positive effect of socioeconomic status on health increases over the life course. In contrast, we  
12 found educational inequalities in the physical health component of HRQOL as well as in poor  
13 SRH to be strongest in the later working life and declining with age. This finding supports the  
14 age-as-leveler hypothesis positing that health inequality decreases at older ages. One possible  
15 explanation for declining educational inequalities over the life stages in physical health could  
16 be that biological frailty in older age may contribute to an intensified health decline of  
17 individuals with high SES leading to a reduction of health inequalities. In addition, retirement  
18 might bring an end to inequalities in the work context with respect to work-related physical  
19 strain. Finally, with age increasing mortality selection in the general population as well as  
20 selective panel attrition may have contributed to the selection of more healthy individuals  
21 with the consequence that the association between education and health appeared to be  
22 weaker at older ages.  
23  
24  
25  
26  
27  
28  
29  
30  
31  
32  
33  
34  
35  
36  
37  
38

### 39 *Life stage-specific trends in educational health inequalities*

40  
41 Previous studies suggest that health inequalities remain stable or even widen over time. Hu et  
42 al.<sup>17</sup> analyzing trends in socioeconomic inequalities in 17 European countries found that  
43 absolute inequalities in SRH remained unchanged while relative inequalities increased  
44 between 1990 and 2010. Lahelma et al.<sup>19</sup> (2019) reported that educational inequalities in SRH  
45 in Finland largely remained constant between 1979 and 2014. In the same way, the study by  
46 Hanibuchi et al.<sup>18</sup> revealed stable trends in socioeconomic inequalities in SRH in Japan  
47 between 2000 and 2010. Analyzing trends in quality-adjusted life expectancy between 2001  
48 and 2011 for the Netherlands, Gheorghe et al.<sup>49</sup> summarized that the largest increases were  
49 found for the higher educated individuals resulting in a widening health gap by education.  
50 Previous studies conducted in Germany yielded comparable results. For example, Lampert et  
51 al.<sup>16</sup> found increasing income inequalities in the prevalence of poor SRH between 1994 and  
52 2014. Based on the data of repeated cross-sectional surveys between 2003 and 2012, the study  
53  
54  
55  
56  
57  
58  
59  
60



1  
2  
3 by Wachtler et al.<sup>9</sup> revealed stable absolute and relative inequalities in SRH between 2003 and  
4 2012. However, most of the cited studies are based on the entire adult population ranging in  
5 age between 25 and 69 years. When considering individuals of all ages, we likewise found  
6 educational inequalities in health to be largely stable over time. However, the differentiated  
7 analysis according to life stages revealed distinctive patterns of health inequality trends. The  
8 study by Granström et al.<sup>50</sup> is one of the few that adopted an life stage-specific view on health  
9 inequality trends. Their findings indicate that the increase in health inequality among women  
10 was mainly due to growing inequalities in early adulthood between 25 and 34 years of age.  
11 The findings of our study on subjects aging 50 years and older revealed a reduction of  
12 educational health inequality in the life stage of young seniors, holding for both genders. In  
13 contrast, health inequalities in later working life widened among women and remained largely  
14 stable for both genders at old age.  
15  
16  
17  
18  
19  
20  
21  
22  
23  
24

### 25 *Explaining life stage-specific health inequality trends*

26  
27 In medical sociological research, it has been established to distinguish between material,  
28 psychosocial and behavioral pathways in explaining social inequalities in health.<sup>51-53</sup> While  
29 the material explanation refers to structural living conditions, the psychosocial pathway  
30 includes a wide range of social and personal resources as well as psychosocial stressors.  
31 Finally, the behavioral explanation considers a variety of health-related behaviors that are  
32 strongly linked with the material and psychosocial pathway.<sup>54</sup> In order to explain trends in  
33 health inequality, a dynamic perspective on these explanations need to be employed that take  
34 medical, demographic, social and economic change into account. This approach represents a  
35 substantial challenge since health inequalities are not a consequence of one or a few  
36 determinants but rather the result of the contribution of a number of interacting influencing  
37 factors. The significance of a life-stage specific approach arises from this fact that the  
38 consequences of medical and social change may have different implications according to  
39 people's phase in life. For example, the decline in health inequality among young seniors as  
40 found in our study might be attributed to medical progress in the prevention and treatment of  
41 diseases that appears to be particularly relevant at this life stage where chronic conditions  
42 gained in importance. While medical advances bring benefit to all educational groups, lower  
43 educated persons may benefit more as they are more vulnerable to chronic conditions what  
44 might partly explain the reduction of health inequality at this age. In the same way, the  
45 increase in work-related stress in recent years in Germany<sup>33</sup> does not apply to retired persons,  
46 which might partly explain the greater health improvement among young seniors as found in a  
47  
48  
49  
50  
51  
52  
53  
54  
55  
56  
57  
58  
59  
60

1  
2  
3 previous study.<sup>34</sup> The same reasoning may apply to the reduction of the educational health gap  
4 among young seniors found in this study. Seen from that perspective, educational differences  
5 in subjective health may decrease at this age as retirement bring an end to the unequal work-  
6 related burden caused by socially stratified working conditions that might have become even  
7 harder for low educated individuals. In contrast, changes in employment rates over the last  
8 decades might have contributed to the increasing health inequalities among women in later  
9 working life. In a previous study we found an overall increase in women's perceived rates of  
10 good self-rated health at this age that was more pronounced as compared with men.<sup>34</sup>  
11 Following the idea by Aguilar-Palacio et al.<sup>55</sup> it was postulated that the increasing presence of  
12 women in the labor force might have contributed to the reduction of the gender gap in SRH.  
13 The finding of our study suggests that not all women benefited equally from the increase in  
14 employment rates. It might be possible that higher educated women have benefited more as  
15 their working activities provide higher levels of autonomy and rewards which proved to be  
16 significant health-promoting resources.<sup>56 57</sup> Conversely, employment may pose higher burdens  
17 to low educated women that would explain the rise in health inequalities found among women  
18 of later working life. In addition to these explanations, different trends in health-related  
19 behaviors might have contributed to the life stage-specific trends in health inequality. For  
20 example, recent findings suggest that probability of obesity increased particularly for younger  
21 cohorts while the rise was less pronounced among older cohorts.<sup>58 59</sup> Finally, it is worth noting  
22 that while the educational expansion over the past decades has affected all ages, the  
23 implications might have been very different depending on the life stage. While today low  
24 educated individuals in Germany represent a minority among younger cohorts, they are still  
25 forming the majority of older cohorts.<sup>60</sup> Hence, low educated individuals in younger ages may  
26 increasingly form a vulnerable subgroup with a high health-risk which is not the case for the  
27 elderly. These varying implications of the educational expansion for different cohorts need to  
28 be considered when exploring life stage-specific trends in health inequality.  
29  
30  
31  
32  
33  
34  
35  
36  
37  
38  
39  
40  
41  
42  
43  
44  
45  
46  
47  
48  
49

### 50 *Strength and limitations*

51  
52 The strength of this study is the large sample size representing the German population and  
53 allowing for stratification according to gender and different stages of life. We used different  
54 indicators of subjective health giving the findings a more substantial interpretation. In  
55 addition, we used established instruments to ensure high construct validity for measuring  
56 subjective health. We enhanced the validity of trend analysis by using measures of both  
57  
58  
59  
60



1  
2  
3 absolute and relative health inequalities. We performed further time trend analyses not  
4 adjusting for potential confounders and found the time trends determined to be very robust.  
5  
6 However, this study has also limitations worth noting. Even though sampling weights were  
7  
8 used, the existence of sampling bias cannot be completely ruled out since a full match of the  
9  
10 official population statistics is not absolutely guaranteed. Selection bias could be due to the  
11  
12 exclusion of the institutionalized population as well as persons who could not participate in  
13  
14 the survey for health reasons. Furthermore, there is a possible existence of a reporting bias  
15  
16 since the outcome and the independent variables are self-reported. As Moor et al.<sup>8</sup> pointed  
17  
18 out, the effect size in the extent of health inequalities depends on the cut-off point chosen for  
19  
20 the categorization of poor health. They conducted a sensitivity analysis, in which  
21  
22 'satisfactory' was part of the reference category 'good health' as it was in this study.  
23  
24 Compared with the alternative in which 'satisfactory' was part of the category 'rather poor  
25  
26 health', they found the relative risk in low educated people to assess their health as poor to be  
27  
28 higher while the absolute difference revealed to be smaller. This finding suggests that the  
29  
30 results obtained depend on the way of classification poor health, indicating that the  
31  
32 generalizability of our study results may be limited. In addition, our key finding of life stage-  
33  
34 specific trends in educational health inequality cannot be clearly attributed to either cohort- or  
35  
36 period-effects. While sociological literature considers a cohort-effect as the sum of all unique  
37  
38 exposures experienced by the cohort from birth, a period-effect result from external factors  
39  
40 that equally affect all age groups at a particular calendar time.<sup>61</sup> In our study, we found  
41  
42 subjective health steadily improving particularly among lower educated young seniors not  
43  
44 fitting in with the idea of an exclusive cohort- or period-effect. Instead our results speak in  
45  
46 favor of a gradual transition that might be better described with the continuing progress of  
47  
48 social and economic change that may have different implications depending on the stage of  
49  
50 people's lives. This idea corresponds better to the conceptualization of age, period and cohort  
51  
52 in epidemiology where a cohort-effect is an effect modification due to a period effect that is  
53  
54 differentially experienced through age-specific exposure or susceptibility to that event or  
55  
56 cause.<sup>62</sup> In this study, we focused on life stage-specific rather than age-specific effects in  
57  
58 order to emphasize that social and demographic change may have altered people's living  
59  
60 conditions differently depending on their stage in the life course and the specific psychosocial  
resources and burdens associated therewith. Lastly, since the observation period of 15 years in  
our study is relatively short, conclusions about the further development of health inequality in  
different life stages cannot be derived from our findings. In particular it is not foreseeable

1  
2  
3 whether the positive trend of narrowed health inequality among young seniors, if confirmed in  
4 further studies, will continue in the future.  
5  
6  
7

### 8 *Conclusions*

9  
10 We found distinctive patterns of health inequality trends in different life stages with  
11 educational health disparities declining among young seniors and rising among women in  
12 later working life. The results emphasize the need for a life stage-approach for analyzing  
13 health inequality trends in order to capture varying effects of social change on different life  
14 stages. Moving from the description to the explanation of health trends would be an important  
15 next step to develop targeted political interventions aiming at tackling inequality in health.  
16  
17  
18  
19  
20  
21

### 22 **Competing interests**

23 None declared.  
24  
25  
26

### 27 **Ethics**

28 Ethics Board approval was not required as we only conducted analyses of completely  
29 anonymized SOEP-datasets.  
30  
31  
32  
33

### 34 **Funding statement**

35 This paper was supported by the DFG (German Research Foundation), grant number GE  
36 1167/15-1.  
37  
38  
39  
40

### 41 **Competing interest statement**

42 All authors have read and understood the BMJ Group policy on declaration of interests and  
43 declared that they have no conflict of interest.  
44  
45  
46  
47

### 48 **Ethical approval**

49 Approval from the ethics committee is not required as this study using pre-existing and de-  
50 identified data.  
51  
52  
53  
54

### 55 **Patient consent for publication**

56 Not required.  
57  
58  
59  
60

### **Author Contributions**

1  
2  
3 SS has made substantial contributions to the concept and design and conducted the statistical  
4 analyses. BS, FT, JT, MKK and SG participated in the design of the study and helped to draft  
5 the manuscript. They have also been involved in revising the manuscript critically for  
6 important intellectual content. All authors read and approved the final manuscript.  
7  
8  
9

### 10 11 **Data availability statement**

12 The raw data were drawn from the German Socio-Economic Panel Study (GSOEP 21 V.31).  
13 The datasets used are available from the corresponding author on reasonable request. German  
14 data privacy laws necessitate that all users sign a data user contract with DIW Berlin.  
15  
16  
17  
18  
19  
20  
21  
22  
23  
24  
25  
26  
27  
28  
29  
30  
31  
32  
33  
34  
35  
36  
37  
38  
39  
40  
41  
42  
43  
44  
45  
46  
47  
48  
49  
50  
51  
52  
53  
54  
55  
56  
57  
58  
59  
60

## REFERENCES

1. Bombak AE. Self-rated health and public health: a critical perspective. *Front Public Health* 2013;1:15-15. doi: 10.3389/fpubh.2013.00015
2. Parker MG, Thorslund M. Health trends in the elderly population: getting better and getting worse. *Gerontologist* 2007;47(2):150-8. doi: 10.1093/geront/47.2.150 [published Online First: 2007/04/19]
3. Roqué IFM, Salvà A, Bolívar I, et al. [Trends in self-perceived health and chronic disability in the elderly Spanish population: evolution between years 1993 and 2006]. *Med Clin (Barc)* 2012;139(7):284-9. doi: 10.1016/j.medcli.2011.06.021 [published Online First: 2011/10/22]
4. Põld M, Pärna K, Ringmets I. Trends in self-rated health and association with socioeconomic position in Estonia: data from cross-sectional studies in 1996-2014. *Int J Equity Health* 2016;15(1):200. doi: 10.1186/s12939-016-0491-9 [published Online First: 2016/12/10]
5. Zack MM, Moriarty DG, Stroup DF, et al. Worsening trends in adult health-related quality of life and self-rated health-United States, 1993-2001. *Public Health Rep* 2004;119(5):493-505. doi: 10.1016/j.phr.2004.07.007 [published Online First: 2004/08/18]
6. Galenkamp H, Braam AW, Huisman M, et al. Seventeen-year time trend in poor self-rated health in older adults: changing contributions of chronic diseases and disability. *Eur J Public Health* 2013;23(3):511-7. doi: 10.1093/eurpub/cks031 [published Online First: 2012/04/12]
7. Mairey I, Bjerregaard P, Brønnum-Hansen H. Gender difference in health expectancy trends in Greenland. *Scand J Public Health* 2014;42(8):751-8. doi: 10.1177/1403494814550174 [published Online First: 2014/09/28]
8. Moor I, Günther S, Knöchelmann A, et al. Educational inequalities in subjective health in Germany from 1994 to 2014: a trend analysis using the German Socio-Economic Panel study (GSOEP). *BMJ Open* 2018;8(6):e019755. doi: 10.1136/bmjopen-2017-019755 [published Online First: 2018/06/10]
9. Wachtler B, Hoebel J, Lampert T. Trends in socioeconomic inequalities in self-rated health in Germany: a time-trend analysis of repeated cross-sectional health surveys between 2003 and 2012. *BMJ Open* 2019;9(9):e030216. doi: 10.1136/bmjopen-2019-030216 [published Online First: 2019/09/29]
10. Ellert U, Kurth B-M. Gesundheitsbezogene Lebensqualität bei Erwachsenen in Deutschland: Robert Koch-Institut, 2013.
11. Trachte F, Sperlich S, Geyer S. [Compression or expansion of morbidity? Development of health among the older population]. *Z Gerontol Geriatr* 2015;48(3):255-62. doi: 10.1007/s00391-014-0644-7 [published Online First: 2014/05/02]
12. Marmot M, Bell R. Social inequalities in health: a proper concern of epidemiology. *Ann Epidemiol* 2016;26(4):238-40. doi: 10.1016/j.annepidem.2016.02.003 [published Online First: 2016/04/17]
13. Marmot M. The Health Gap: The Challenge of an Unequal World: the argument. *Int J Epidemiol* 2017;46(4):1312-18. doi: 10.1093/ije/dyx163 [published Online First: 2017/09/25]
14. Bopp M, Mackenbach JP. [Death is a respecter of persons : 30 years of research comparing European countries regarding social inequality in mortality]. *Z Gerontol Geriatr* 2019;52(2):122-29. doi: 10.1007/s00391-019-01530-6 [published Online First: 2019/03/16]
15. Mackenbach JP, Stirbu I, Roskam AJ, et al. Socioeconomic inequalities in health in 22 European countries. *N Engl J Med* 2008;358(23):2468-81. doi: 10.1056/NEJMsa0707519 [published Online First: 2008/06/06]
16. Lampert T, Schmidtke C, Borgmann L-S, et al. Subjektive Gesundheit bei Erwachsenen in Deutschland. *Journal of Health Monitoring* 2018(3):64-71. doi: <http://dx.doi.org/10.17886/RKI-GBE-2018-068>
17. Hu Y, van Lenthe FJ, Borsboom GJ, et al. Trends in socioeconomic inequalities in self-assessed health in 17 European countries between 1990 and 2010. *J Epidemiol Community Health* 2016;70(7):644-52. doi: 10.1136/jech-2015-206780 [published Online First: 2016/01/21]

18. Hanibuchi T, Nakaya T, Honjo K. Trends in socioeconomic inequalities in self-rated health, smoking, and physical activity of Japanese adults from 2000 to 2010. *SSM Popul Health* 2016;2:662-73. doi: 10.1016/j.ssmph.2016.09.002 [published Online First: 2016/09/09]
19. Lahelma E, Pietiläinen O, Pentala-Nikulainen O, et al. 36-year trends in educational inequalities in self-rated health among Finnish adults. *SSM Popul Health* 2019;9:100504-04. doi: 10.1016/j.ssmph.2019.100504
20. Hoebel J, Kuntz B, Moor I, et al. Post-millennial trends of socioeconomic inequalities in chronic illness among adults in Germany. *BMC Res Notes* 2018;11(1):200. doi: 10.1186/s13104-018-3299-4 [published Online First: 2018/03/28]
21. Ferraro KF, Shippee TP. Aging and cumulative inequality: how does inequality get under the skin? *Gerontologist* 2009;49(3):333-43. doi: 10.1093/geront/gnp034 [published Online First: 2009/04/21]
22. Pampel FC, Hardy M. Status Maintenance and Change during Old Age\*. *Social Forces* 1994;73(1):289-314. doi: 10.1093/sf/73.1.289
23. George LK. The Life Course Perspective. In: Gu D, Dupre ME, eds. *Encyclopedia of Gerontology and Population Aging*. Cham: Springer International Publishing 2019:1-9.
24. Andrea E. Willson, Kim M. Shuey, Glen H. Elder J. Cumulative Advantage Processes as Mechanisms of Inequality in Life Course Health. *American Journal of Sociology* 2007;112(6):1886-924. doi: 10.1086/512712
25. Leopold L, Engelhardt H. Education and physical health trajectories in old age. Evidence from the Survey of Health, Ageing and Retirement in Europe (SHARE). *International Journal of Public Health* 2013;58(1):23-31. doi: 10.1007/s00038-012-0399-0
26. Schöllgen I, Huxhold O, Tesch-Römer C. Socioeconomic status and health in the second half of life: findings from the German Ageing Survey. *European Journal of Ageing* 2010;7(1):17-28. doi: 10.1007/s10433-010-0140-x
27. Herd P. Do Functional Health Inequalities Decrease in Old Age?: Educational Status and Functional Decline Among the 1931-1941 Birth Cohort. *Research on Aging* 2006;28(3):375-92. doi: 10.1177/0164027505285845
28. Pavalko EK, Caputo J. Social Inequality and Health Across the Life Course. *American Behavioral Scientist* 2013;57(8):1040-56. doi: 10.1177/0002764213487344
29. Larson K, Russ SA, Kahn RS, et al. Health Disparities: A Life Course Health Development Perspective and Future Research Directions. In: Halfon N, Forrest CB, Lerner RM, et al., eds. *Handbook of Life Course Health Development*. Cham: Springer International Publishing 2018:499-520.
30. San Sebastian M, Hammarström A, Gustafsson PE. Socioeconomic inequalities in functional somatic symptoms by social and material conditions at four life course periods in Sweden: a decomposition analysis. *BMJ Open* 2015;5(8):e006581. doi: 10.1136/bmjopen-2014-006581
31. Johansson SE, Midlöv P, Sundquist J, et al. Longitudinal trends in good self-rated health: effects of age and birth cohort in a 25-year follow-up study in Sweden. *Int J Public Health* 2015;60(3):363-73. doi: 10.1007/s00038-015-0658-y [published Online First: 2015/02/05]
32. Clause-Verdreau AC, Audureau É, Leplège A, et al. Contrasted trends in health-related quality of life across gender, age categories and work status in France, 1995-2016: repeated population-based cross-sectional surveys using the SF-36. *J Epidemiol Community Health* 2019;73(1):65-72. doi: 10.1136/jech-2018-210941 [published Online First: 2018/10/12]
33. Wolff JK, Nowossadeck S, Spuling SM. Altern nachfolgende Kohorten gesünder? Selbstberichtete Erkrankungen und funktionale Gesundheit im Kohortenvergleich. In: Mahne K, Wolff JK, Simonson J, et al., eds. *Altern im Wandel: Zwei Jahrzehnte Deutscher Alterssurvey (DEAS)*. Wiesbaden: Springer Fachmedien Wiesbaden 2017:125-38.
34. Sperlich S, Tetzlaff J, Geyer S. Trends in good self-rated health in Germany between 1995 and 2014: do age and gender matter? *Int J Public Health* 2019;64(6):921-33. doi: 10.1007/s00038-019-01235-y [published Online First: 2019/03/29]

- 1
  - 2
  - 3
  - 4
  - 5
  - 6
  - 7
  - 8
  - 9
  - 10
  - 11
  - 12
  - 13
  - 14
  - 15
  - 16
  - 17
  - 18
  - 19
  - 20
  - 21
  - 22
  - 23
  - 24
  - 25
  - 26
  - 27
  - 28
  - 29
  - 30
  - 31
  - 32
  - 33
  - 34
  - 35
  - 36
  - 37
  - 38
  - 39
  - 40
  - 41
  - 42
  - 43
  - 44
  - 45
  - 46
  - 47
  - 48
  - 49
  - 50
  - 51
  - 52
  - 53
  - 54
  - 55
  - 56
  - 57
  - 58
  - 59
  - 60
35. Beller J, Miething A, Regidor E, et al. Trends in grip strength: Age, period, and cohort effects on grip strength in older adults from Germany, Sweden, and Spain. *SSM - Population Health* 2019;9:100456. doi: <https://doi.org/10.1016/j.ssmph.2019.100456>
36. von Elm E, Altman DG, Egger M, et al. The Strengthening the Reporting of Observational Studies in Epidemiology (STROBE) statement: guidelines for reporting observational studies. *J Clin Epidemiol* 2008;61(4):344-9. doi: 10.1016/j.jclinepi.2007.11.008 [published Online First: 2008/03/04]
37. Frick J, Schupp J, Wagner G. The German Socio-Economic Panel Study (SOEP)—Scope, evolution and enhancements. *Schmollers Jahrbuch : Journal of Applied Social Science Studies / Zeitschrift für Wirtschafts- und Sozialwissenschaften* 2007;127:139-69. doi: 10.2139/ssrn.1028709
38. Goebel J, Grabka MM, Liebig S, et al. The German Socio-Economic Panel (SOEP). 2019;239(2):345. doi: <https://doi.org/10.1515/jbnst-2018-0022>
39. DeSalvo KB, Fan VS, McDonnell MB, et al. Predicting mortality and healthcare utilization with a single question. *Health Serv Res* 2005;40(4):1234-46. doi: 10.1111/j.1475-6773.2005.00404.x [published Online First: 2005/07/22]
40. Idler EL, Russell LB, Davis D. Survival, Functional Limitations, and Self-rated Health in the NHANES I Epidemiologic Follow-up Study, 1992. *American Journal of Epidemiology* 2000;152(9):874-83. doi: 10.1093/aje/152.9.874
41. Jylhä M. What is self-rated health and why does it predict mortality? Towards a unified conceptual model. *Soc Sci Med* 2009;69(3):307-16. doi: 10.1016/j.socscimed.2009.05.013 [published Online First: 2009/06/13]
42. Bullinger M, Quitmann J. Quality of life as patient-reported outcomes: principles of assessment. *Dialogues Clin Neurosci* 2014;16(2):137-45. [published Online First: 2014/08/26]
43. Nübling M, Andersen H, Mühlbacher A, et al. Computation of Standard Values for Physical and Mental Health Scale Scores Using the SOEP Version of SF12v2. *Schmollers Jahrbuch : Journal of Applied Social Science Studies / Zeitschrift für Wirtschafts- und Sozialwissenschaften* 2007;127(1):171-82.
44. Liang K-Y, Zeger SL. Longitudinal data analysis using generalized linear models. *Biometrika* 1986;73(1):13-22. doi: 10.1093/biomet/73.1.13
45. Hu FB, Goldberg J, Hedeker D, et al. Comparison of Population-Averaged and Subject-Specific Approaches for Analyzing Repeated Binary Outcomes. *American Journal of Epidemiology* 1998;147(7):694-703. doi: 10.1093/oxfordjournals.aje.a009511
46. Mackenbach JP, Kunst AE. Measuring the magnitude of socio-economic inequalities in health: an overview of available measures illustrated with two examples from Europe. *Soc Sci Med* 1997;44(6):757-71. doi: 10.1016/s0277-9536(96)00073-1 [published Online First: 1997/03/01]
47. Bardel A, Wallander MA, Wallman T, et al. Age and sex related self-reported symptoms in a general population across 30 years: Patterns of reporting and secular trend. *PLoS One* 2019;14(2):e0211532. doi: 10.1371/journal.pone.0211532 [published Online First: 2019/02/05]
48. Asada Y, Hurley J, Grignon M, et al. Health inequalities and inequities by age: Stability for the Health Utilities Index and divergence for the Frailty Index. *SSM - Population Health* 2018;5:17-32. doi: <https://doi.org/10.1016/j.ssmph.2018.04.002>
49. Gheorghe M, Wubulihassimu P, Peters F, et al. Health inequalities in the Netherlands: trends in quality-adjusted life expectancy (QALE) by educational level. *Eur J Public Health* 2016;26(5):794-99. doi: 10.1093/eurpub/ckw043 [published Online First: 2016/04/17]
50. Granström F, Molarius A, Garvin P, et al. Exploring trends in and determinants of educational inequalities in self-rated health. *Scand J Public Health* 2015;43(7):677-86. doi: 10.1177/1403494815592271 [published Online First: 2015/07/04]



- 1  
2  
3 51. Duijster D, Oude Groeniger J, van der Heijden GJMG, et al. Material, behavioural, cultural and  
4 psychosocial factors in the explanation of socioeconomic inequalities in oral health. *European*  
5 *Journal of Public Health* 2017;28(4):590-97. doi: 10.1093/eurpub/ckx209  
6  
7 52. Khang Y-H, Lynch JW, Yang S, et al. The contribution of material, psychosocial, and behavioral  
8 factors in explaining educational and occupational mortality inequalities in a nationally  
9 representative sample of South Koreans: Relative and absolute perspectives. *Social Science &*  
10 *Medicine* 2009;68(5):858-66. doi: <https://doi.org/10.1016/j.socscimed.2008.12.003>  
11  
12 53. van Oort FVA, van Lenthe FJ, Mackenbach JP. Material, psychosocial, and behavioural factors in  
13 the explanation of educational inequalities in mortality in the Netherlands. *Journal of*  
14 *Epidemiology and Community Health* 2005;59(3):214-20. doi: 10.1136/jech.2003.016493  
15  
16 54. Moor I, Spallek J, Richter M. Explaining socioeconomic inequalities in self-rated health: a  
17 systematic review of the relative contribution of material, psychosocial and behavioural  
18 factors. *J Epidemiol Community Health* 2017;71(6):565-75. doi: 10.1136/jech-2016-207589  
19 [published Online First: 2016/09/30]  
20  
21 55. Aguilar-Palacio I, Carrera-Lasfuentes P, Sánchez-Recio R, et al. Recession, employment and self-  
22 rated health: a study on the gender gap. *Public Health* 2018;154:44-50. doi:  
23 10.1016/j.puhe.2017.10.013 [published Online First: 2017/12/05]  
24  
25 56. Karasek R, Baker D, Marxer F, et al. Job decision latitude, job demands, and cardiovascular  
26 disease: a prospective study of Swedish men. *Am J Public Health* 1981;71(7):694-705. doi:  
27 10.2105/ajph.71.7.694 [published Online First: 1981/07/01]  
28  
29 57. Caman OK, Calling S, Midlöv P, et al. Longitudinal age-and cohort trends in body mass index in  
30 Sweden--a 24-year follow-up study. *BMC Public Health* 2013;13:893-93. doi: 10.1186/1471-  
31 2458-13-893  
32  
33 58. Reither EN, Hauser RM, Yang Y. Do birth cohorts matter? Age-period-cohort analyses of the  
34 obesity epidemic in the United States. *Social science & medicine (1982)* 2009;69(10):1439-48.  
35 doi: 10.1016/j.socscimed.2009.08.040 [published Online First: 2009/09/19]  
36  
37 59. Diouf I, Charles MA, Ducimetière P, et al. Evolution of obesity prevalence in France: an age-  
38 period-cohort analysis. *Epidemiology* 2010;21(3):360-65. doi:  
39 10.1097/EDE.0b013e3181d5bff5  
40  
41 60. Statistisches Jahrbuch 2019. Deutschland und Internationales [www.destatis.de/jahrbuch](http://www.destatis.de/jahrbuch):  
42 Statistisches Bundesamt (Destatis); 2019 [accessed 15. May 2019 2019].  
43  
44 61. Blanchard RD, Bunker JB, Wachs M. Distinguishing aging, period and cohort effects in longitudinal  
45 studies of elderly populations. *Socio-Economic Planning Sciences* 1977;11(3):137-46. doi:  
46 [https://doi.org/10.1016/0038-0121\(77\)90032-5](https://doi.org/10.1016/0038-0121(77)90032-5)  
47  
48 62. Keyes KM, Utz RL, Robinson W, et al. What is a cohort effect? Comparison of three statistical  
49 methods for modeling cohort effects in obesity prevalence in the United States, 1971-2006.  
50 *Soc Sci Med* 2010;70(7):1100-8. doi: 10.1016/j.socscimed.2009.12.018 [published Online  
51 First: 2010/02/04]  
52  
53  
54  
55  
56  
57  
58  
59  
60

**Table 1:** Weighted sample characteristics in % by time period, GSOEP 2002-2016,  $n_{\text{observations}}=170,317$ .

|                            | <b>2002-2006</b><br><b>(n=54,244)</b> | <b>2007-2011</b><br><b>(n=56,299)</b> | <b>2012-2016</b><br><b>(n=59,774)</b> |
|----------------------------|---------------------------------------|---------------------------------------|---------------------------------------|
| <b>Sex</b>                 | %                                     | %                                     | %                                     |
| Women                      | 54.2                                  | 53.7                                  | 53.2                                  |
| Men                        | 45.8                                  | 46.3                                  | 46.8                                  |
| Missings (n)               | 0                                     | 0                                     | 0                                     |
| <b>Age groups in years</b> |                                       |                                       |                                       |
| 50-64                      | 49.2                                  | 48.2                                  | 50.0                                  |
| 65-79                      | 40.2                                  | 40.0                                  | 38.7                                  |
| 80+                        | 10.6                                  | 11.8                                  | 11.3                                  |
| missing (n)                | 0                                     | 0                                     | 0                                     |
| <b>School education</b>    |                                       |                                       |                                       |
| primary / no education     | 58,5                                  | 51,3                                  | 43.9                                  |
| secondary                  | 19,5                                  | 23,4                                  | 26.2                                  |
| tertiary                   | 14,6                                  | 17,0                                  | 19.6                                  |
| other qualification        | 7.4                                   | 8.3                                   | 10.3                                  |
| missing (n)                | 1689                                  | 1262                                  | 1212                                  |
| <b>Income</b>              |                                       |                                       |                                       |
| <60%                       | 14.5                                  | 15.8                                  | 15.3                                  |
| 60% - < 150%               | 67.5                                  | 65.9                                  | 65.6                                  |
| ≥ 150 %                    | 18.0                                  | 18.3                                  | 19.1                                  |
| missing (n)                | 16                                    | 13                                    | 31                                    |
| <b>Living with partner</b> |                                       |                                       |                                       |
| yes                        | 67.8                                  | 66.7                                  | 66.6                                  |
| no                         | 32.2                                  | 33.3                                  | 33.4                                  |
| missing (n)                | 0                                     | 0                                     | 1                                     |
| <b>Nationality</b>         |                                       |                                       |                                       |
| German                     | 93.6                                  | 92.8                                  | 92.8                                  |
| others                     | 6.4                                   | 7.2                                   | 7.2                                   |
| missing (n)                | 0                                     | 0                                     | 1                                     |

GSOEP: German Socio-Economic Panel; n= number of observations (maximum sample size of annually surveys 2002 to 2016), income: equivalized net income.



**Table 2:** Educational inequalities in HRQOL (MCS and PCS) and poor SRH in men and women, stratified by life stage, GSOEP 2002-2016

|                                       |           | Men   |                          |               |                 |               |                |       |             |
|---------------------------------------|-----------|-------|--------------------------|---------------|-----------------|---------------|----------------|-------|-------------|
|                                       |           | MCS   |                          |               | PCS             |               | Poor SRH       |       |             |
| Life stage                            | Education | n     | Coef.                    | 95% CI        | Coef.           | 95% CI        | OR             | n     | 95% CI      |
| <b>all ages</b>                       | low       | 13902 | <b>-0.85***</b>          | -1.31 - -0.40 | <b>-4.07***</b> | -4.53 - -3.61 | <b>1.66***</b> | 30102 | 1.50 - 1.84 |
|                                       | medium    | 6857  | <b>-0.48<sup>◇</sup></b> | -0.98 - 0.02  | <b>-2.40***</b> | -2.88 - -1.92 | <b>1.21**</b>  | 14604 | 1.08 - 1.37 |
|                                       | high      | 8578  | 1                        |               | 1               |               | 1              | 17640 |             |
| <b>Later working life (50-64 yr.)</b> | low       | 6050  | -0.40                    | -0.99 - 0.19  | <b>-4.59***</b> | -5.17 - -4.00 | <b>1.90***</b> | 13042 | 1.65 - 2.17 |
|                                       | medium    | 4501  | -0.42                    | -1.01 - 0.18  | <b>-2.70***</b> | -3.26 - -2.15 | <b>1.28**</b>  | 9590  | 1.11 - 1.48 |
|                                       | high      | 5008  | 1                        |               | 1               |               | 1              | 10411 |             |
| <b>Young seniors (65-79 yr.)</b>      | low       | 6727  | <b>-1.23***</b>          | -1.89 - -0.57 | <b>-3.49***</b> | -4.19 - -2.79 | <b>1.51***</b> | 14484 | 1.30 - 1.75 |
|                                       | medium    | 2031  | -0.25                    | -1.05-0.55    | <b>-1.89***</b> | -2.76 - -1.03 | 1.15           | 4278  | 0.96 - 1.39 |
|                                       | high      | 3140  | 1                        |               | 1               |               | 1              | 6244  |             |
| <b>Old age (80+ yr.)</b>              | low       | 1125  | <b>-2.25*</b>            | -4.14 - -0.36 | <b>-2.29**</b>  | -4.01 - -0.57 | <b>1.42*</b>   | 2576  | 1.05 - 1.11 |
|                                       | medium    | 325   | -1.42                    | -3.40 - 0.55  | -1.31           | -3.42 - 0.79  | 1.20           | 736   | 0.83 - 1.74 |
|                                       | high      | 430   | 1                        |               | 1               |               | 1              | 985   |             |
|                                       |           | Women |                          |               |                 |               |                |       |             |
|                                       |           | MCS   |                          |               | PCS             |               | Poor SRH       |       |             |
| Life stage                            | Education | n     | Coef.                    | 95% CI        | Coef.           | 95% CI        | OR             | n     | 95% CI      |
| <b>all ages</b>                       | low       | 16251 | <b>-1.10***</b>          | -1.64 - -0.57 | <b>-3.31***</b> | -3.84 - -2.77 | <b>1.56***</b> | 35521 | 1.40-1.75   |
|                                       | medium    | 9544  | -0.21                    | -0.74 - 0.33  | <b>-1.76***</b> | -2.29 - -1.22 | <b>1.19**</b>  | 20149 | 1.06-1.34   |
|                                       | high      | 5970  | 1                        |               | 1               |               | 1              | 12599 |             |
| <b>Later working life (50-64 yr.)</b> | low       | 6347  | -0.50                    | -1.16 - 0.17  | <b>-3.67***</b> | -4.32 - -3.02 | <b>1.54***</b> | 13665 | 1.34 - 1.76 |
|                                       | medium    | 6494  | 0.50                     | -0.57 - 0.67  | <b>-1.91***</b> | -2.52 - -1.32 | 1.10           | 13609 | 0.96 - 1.26 |
|                                       | high      | 4103  | 1                        |               | 1               |               | 1              | 8561  |             |
| <b>Young seniors (65-79 yr.)</b>      | low       | 7880  | <b>-2.64***</b>          | -3.47 - -1.80 | <b>-3.16***</b> | -4.08 - -2.24 | <b>1.77***</b> | 17176 | 1.48 - 2.12 |
|                                       | medium    | 2590  | <b>-1.04*</b>            | -1.97 - -0.12 | <b>-1.81**</b>  | -2.83 - -0.78 | <b>1.39**</b>  | 5519  | 1.14 - 1.70 |
|                                       | high      | 1615  | 1                        |               | 1               |               | 1              | 3422  |             |
| <b>Old age (80+ yr.)</b>              | low       | 2024  | <b>-3.87***</b>          | -5.99 - -1.74 | -1.02           | -3.00 - 0.96  | <b>1.43*</b>   | 4680  | 1.04 - 1.08 |
|                                       | medium    | 460   | -1.65                    | -4.08 - -0.77 | 1.54            | -0.74 - 3.82  | 1.08           | 1021  | 0.76 - 6.21 |
|                                       | high      | 252   | 1                        |               | 1               |               | 1              | 616   |             |

Adjusted for age, nationality, living with partner and equivalized net income; GSOEP: German Socio-Economic Panel; MCS: Mental Component Summary; PCS: Physical Component Summary; SRH: Self-Rated Health; Coef.: Coefficient; CI: Confidence Interval; <sup>◇</sup> p<0.10, \*p<0.05, \*\*p<0.01, \*\*\*p<0.001.

**Table 3:** Time trends in HRQOL (MCS and PCS) and poor SRH in men and women, stratified by life stage and level of education, GSOEP 2002-2016

| Time trend                              | Men   |                |               |                         |               |          |                         |             |
|-----------------------------------------|-------|----------------|---------------|-------------------------|---------------|----------|-------------------------|-------------|
|                                         | MCS   |                |               | PCS                     |               | Poor SRH |                         |             |
|                                         | n     | Coeff.         | 95% CI        | Coeff.                  | 95% CI        | n        | OR                      | 95% CI      |
| <b>Later working life (50 - 64 yr.)</b> |       |                |               |                         |               |          |                         |             |
| Education low                           | 6050  | 0.79           | - 0.16 - 1.74 | - 0.68                  | - 1.63 - 0.27 | 13042    | 1.06                    | 0.89 - 1.26 |
| medium                                  | 4501  | 0.21           | - 0.90 - 1.33 | - 0.75                  | - 1.79 - 0.30 | 9590     | 1.12                    | 0.89 - 1.44 |
| high                                    | 5008  | <b>1.01*</b>   | 0.04 - 1.98   | - 0.32                  | - 1.20 - 0.56 | 10411    | 1.00                    | 0.77 - 1.30 |
| <b>Young seniors (65 - 79 yr.)</b>      |       |                |               |                         |               |          |                         |             |
| Education low                           | 6727  | <b>1.82***</b> | 0.80 - 2.85   | <b>1.56**</b>           | 0.56 - 2.56   | 14484    | <b>0.69***</b>          | 0.57 - 0.83 |
| medium                                  | 2031  | <b>1.85*</b>   | 0.19 - 3.50   | 0.33                    | - 1.33 - 2.00 | 4278     | 1.16                    | 0.77 - 1.62 |
| high                                    | 3140  | 0.47           | - 0.89 - 1.83 | 0.53                    | - 0.87 - 1.93 | 6244     | <b>0.74<sup>◇</sup></b> | 0.53 - 1.08 |
| <b>Old age (80+ yr.)</b>                |       |                |               |                         |               |          |                         |             |
| Education low                           | 1125  | 0.63           | - 2.31 - 3.57 | 0.05                    | - 2.42 - 2.53 | 2576     | 0.91                    | 0.61 - 1.35 |
| medium                                  | 325   | -2.63          | - 7.05 - 1.80 | 2.07                    | - 2.97 - 7.10 | 736      | 1.22                    | 0.56 - 2.65 |
| high                                    | 430   | 2.59           | - 1.57 - 6.75 | 0.89                    | - 2.79 - 4.57 | 985      | 0.56                    | 0.26 - 1.21 |
|                                         | Women |                |               |                         |               |          |                         |             |
| Time trend                              | MCS   |                |               | PCS                     |               | Poor SRH |                         |             |
|                                         | n     | Coeff.         | 95% CI        | Coeff.                  | 95% CI        | n        | OR                      | 95% CI      |
| <b>Later working life (50 - 64 yr.)</b> |       |                |               |                         |               |          |                         |             |
| Education low                           | 6347  | 0.90           | - 0.10 - 1.89 | <b>-1.65**</b>          | - 2.65 - 0.66 | 13665    | <b>1.33*</b>            | 1.12 - 1.59 |
| medium                                  | 6494  | 0.36           | - 0.60 - 1.32 | - 0.34                  | - 1.25 - 0.57 | 13609    | 1.04                    | 0.84 - 1.28 |
| high                                    | 4103  | 0.78           | - 0.39 - 1.95 | 0.36                    | - 0.78 - 1.49 | 8561     | 0.97                    | 0.75 - 1.27 |
| <b>Young seniors (65 - 79 yr.)</b>      |       |                |               |                         |               |          |                         |             |
| Education low                           | 7880  | <b>2.75***</b> | 1.74 - 3.76   | <b>1.30**</b>           | 0.39 - 2.21   | 17176    | <b>0.73***</b>          | 0.62 - 0.89 |
| medium                                  | 2590  | 0.78           | - 0.78 - 2.34 | - 0.13                  | - 1.83 - 1.57 | 5519     | 0.83                    | 0.61 - 1.13 |
| high                                    | 1615  | 1.44           | - 0.58 - 3.45 | <b>1.97<sup>◇</sup></b> | - 0.01 - 3.94 | 3422     | <b>0.67<sup>◇</sup></b> | 0.43 - 1.03 |
| <b>Old age (80+ yr.)</b>                |       |                |               |                         |               |          |                         |             |
| Education low                           | 2024  | 0.77           | - 1.33 - 2.87 | 0.61                    | - 1.01 - 2.22 | 4680     | 0.70                    | 0.53 - 0.94 |
| medium                                  | 460   | 0.04           | - 4.62 - 4.71 | <b>3.35<sup>◇</sup></b> | - 0.04 - 6.74 | 1021     | 0.75                    | 0.41 - 1.36 |
| high                                    | 252   | 1.57           | - 2.80 - 5.95 | 1.59                    | - 3.97 - 7.15 | 616      | 0.88                    | 0.41 - 1.90 |

Adjusted for age, nationality, living with partner and equivalized net income; MCS: Mental Component Summary; PCS: Physical Component Summary; SRH: Self-Rated Health; n: number of observations; GSOEP: German Socio-Economic Panel; <sup>◇</sup> p<0.10, \*p<0.05, \*\*p<0.01, \*\*\*p<0.001

**Table 4:** Trends in relative (RII) and absolute (SII) educational inequalities in HRQOL (MCS and PCS) and poor SRH, stratified by gender and life stage, GSEOP 2002-2016

|                                         |          | n     | RII                     | 95% CI    | SII                     | 95% CI       |
|-----------------------------------------|----------|-------|-------------------------|-----------|-------------------------|--------------|
| <b>Men</b>                              |          |       |                         |           |                         |              |
| <b>all ages</b>                         | MCS      | 35208 | 1.01                    | 0.98-1.04 | 0.52                    | -0.84-1.87   |
|                                         | PCS      | 35208 | 1.02                    | 0.99-1.05 | 0.91                    | -0.38-2.20   |
|                                         | Poor SRH | 69095 | 0.88                    | 0.69-1.12 | -0.03                   | -0.08-0.03   |
| <b>Later working life (50 - 64 yr.)</b> | MCS      | 18947 | 1.00                    | 0.96-1.03 | -0.20                   | -2.04-1.64   |
|                                         | PCS      | 18947 | 0.99                    | 0.95-1.03 | -0.56                   | -2.39-1.23   |
|                                         | Poor SRH | 37316 | 1.16                    | 0.80-1.67 | 0.03                    | -0.04-0.10   |
| <b>Young Seniors (65-79 yr.)</b>        | MCS      | 13840 | <b>1.05*</b>            | 1.01-1.10 | <b>2.76*</b>            | 0.41-5.11    |
|                                         | PCS      | 13840 | <b>1.05<sup>◇</sup></b> | 1.00-1.11 | <b>2.12<sup>◇</sup></b> | -0.3-4.5     |
|                                         | Poor SRH | 27028 | 0.73                    | 0.48-1.13 | <b>-0.10*</b>           | -0.19-0.01   |
| <b>Old age (80+yr.)</b>                 | MCS      | 2421  | 1.03                    | 0.91-1.17 | 1.44                    | -5.20-5.09   |
|                                         | PCS      | 2421  | 0.89                    | 0.77-1.04 | -4.71                   | -10.6-11.6   |
|                                         | Poor SRH | 4751  | 1.08                    | 0.52-2.26 | 0.06                    | -0.23-0.34   |
| <b>Women</b>                            |          |       |                         |           |                         |              |
|                                         |          | n     | RII                     | 95% CI    | SII                     | 95% CI       |
| <b>all ages</b>                         | MCS      | 38229 | <b>1.03*</b>            | 1.00-1.06 | <b>1.41<sup>◇</sup></b> | -0.03-2.86   |
|                                         | PCS      | 38229 | 0.98                    | 0.95-1.01 | -0.59                   | -1.95-0.76   |
|                                         | Poor SRH | 75142 | 0.99                    | 0.80-1.23 | 0.01                    | -0.04-0.06   |
| <b>Later working life (50 - 64 yr.)</b> | MCS      | 20412 | 1.00                    | 0.97-1.04 | 0.27                    | -1.61-2.15   |
|                                         | PCS      | 20412 | <b>0.94*</b>            | 0.90-0.98 | <b>-2.98**</b>          | -4.86- -1.11 |
|                                         | Poor SRH | 40074 | <b>1.32<sup>◇</sup></b> | 0.95-1.83 | <b>0.07*</b>            | 0.00-0.14    |
| <b>Young Seniors (65-79 yr.)</b>        | MCS      | 14371 | <b>1.06*</b>            | 1.01-1.12 | <b>2.82*</b>            | 0.16-5.50    |
|                                         | PCS      | 14371 | 1.02                    | 0.96-1.09 | 0.85                    | -1.82-3.52   |
|                                         | Poor SRH | 28179 | 1.10                    | 0.74-1.63 | -0.04                   | -0.14-0.07   |
| <b>Old age (80+yr.)</b>                 | MCS      | 3446  | 1.03                    | 0.91-1.17 | 1.19                    | -5.25-7.63   |
|                                         | PCS      | 3446  | 0.97                    | 0.84-1.13 | -0.96                   | -6.63-4.72   |
|                                         | Poor SRH | 6889  | 1.02                    | 0.57-1.22 | -0.02                   | -0.28-0.23   |

Adjusted for age, nationality, living with partner and equivalised net income; MCS: Mental Component Summary; PCS: Physical Component Summary, SRH: Self-Rated Health; n: number of observations; GSEOP: German Socio-Economic Panel; RII: Relative Index of Inequality, SII: Slope Index of inequality; <sup>◇</sup> p<0.10, \*p<0.05, \*\*p<0.01, \*\*\*p<0.001

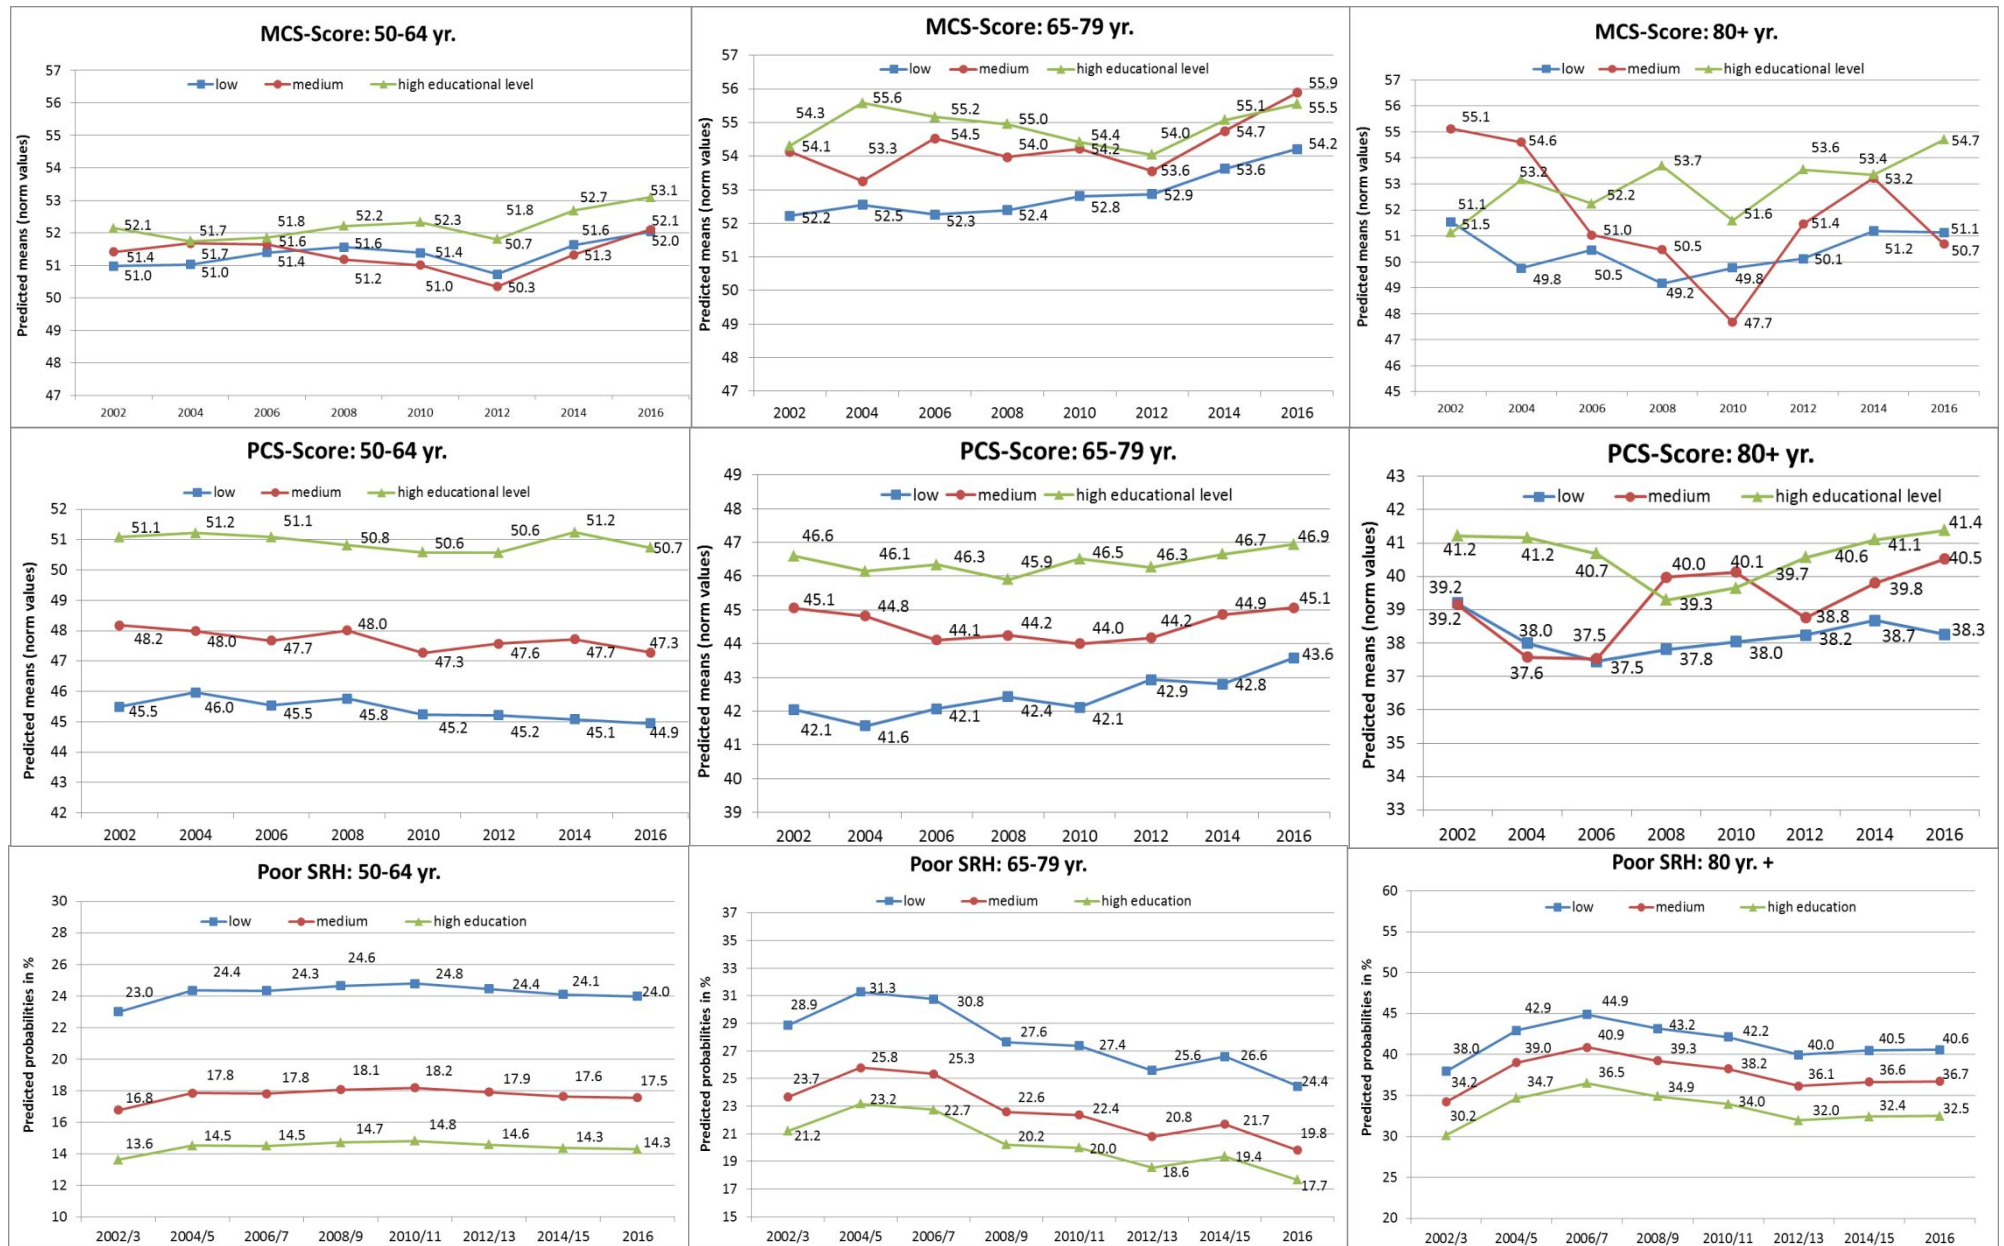

Figure 1: Trends in in HRQOL (MCS / PCS) and poor SRH (predicted means and probabilities) by life stages among men.

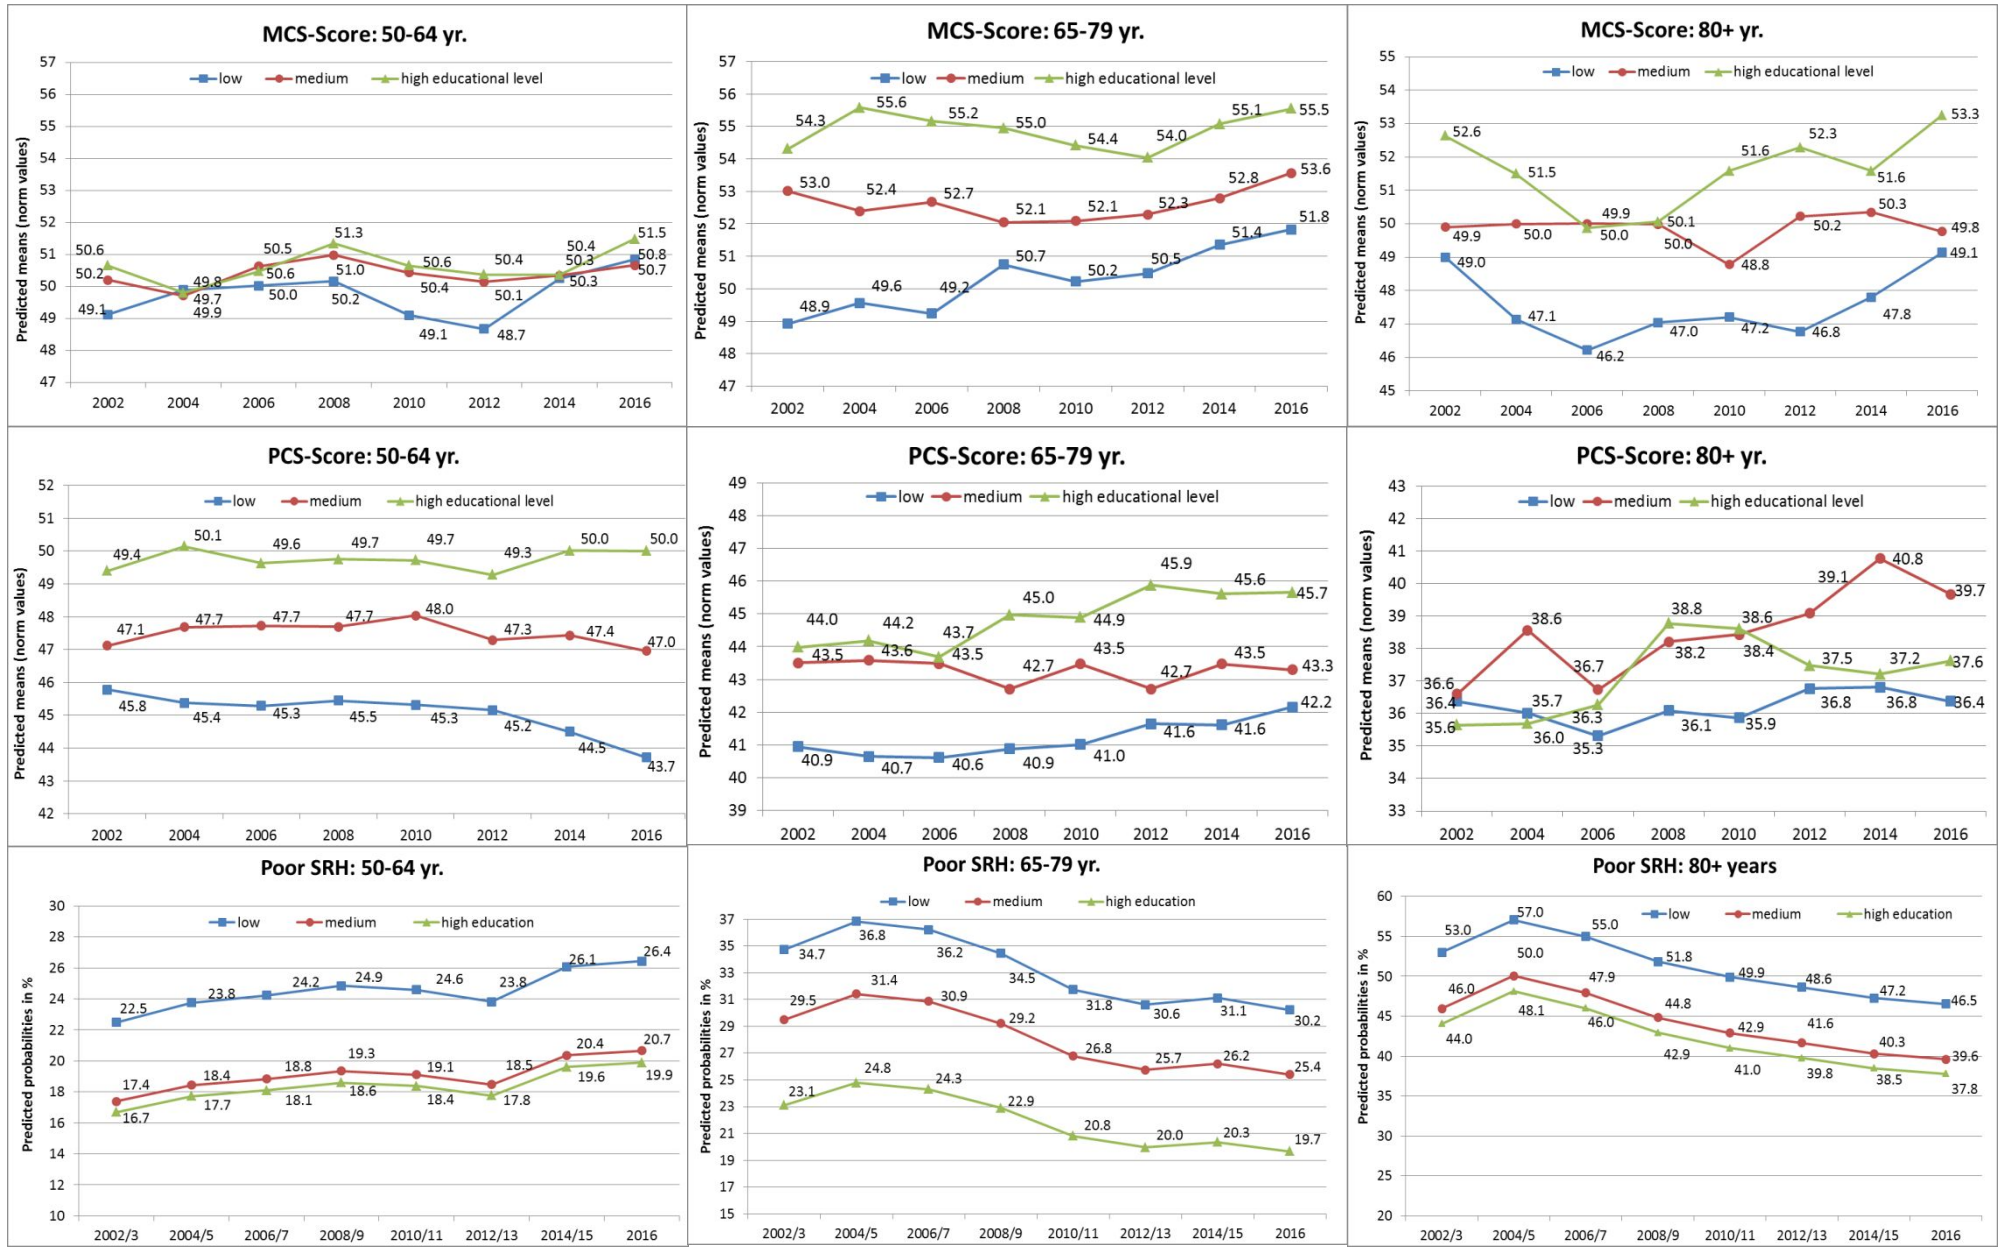

Figure 2: Trends in HRQOL (MCS / PCS) and poor SRH (predicted means and probabilities) by life stages among women.



# Reporting checklist for cross sectional study.

Based on the STROBE cross sectional guidelines.

## Instructions to authors

Complete this checklist by entering the page numbers from your manuscript where readers will find each of the items listed below.

Your article may not currently address all the items on the checklist. Please modify your text to include the missing information. If you are certain that an item does not apply, please write "n/a" and provide a short explanation.

Upload your completed checklist as an extra file when you submit to a journal.

In your methods section, say that you used the STROBE cross sectional reporting guidelines, and cite them as:

von Elm E, Altman DG, Egger M, Pocock SJ, Gøtzsche PC, Vandenbroucke JP. The Strengthening the Reporting of Observational Studies in Epidemiology (STROBE) Statement: guidelines for reporting observational studies.

|                           | Reporting Item                                                                                                      | Page Number |
|---------------------------|---------------------------------------------------------------------------------------------------------------------|-------------|
| <b>Title and abstract</b> |                                                                                                                     |             |
| Title                     | <a href="#">#1a</a> Indicate the study's design with a commonly used term in the title or the abstract              | 1           |
| Abstract                  | <a href="#">#1b</a> Provide in the abstract an informative and balanced summary of what was done and what was found | 2           |
| <b>Introduction</b>       |                                                                                                                     |             |
| Background / rationale    | <a href="#">#2</a> Explain the scientific background and rationale for the investigation being reported             | 4           |
| Objectives                | <a href="#">#3</a> State specific objectives, including any prespecified hypotheses                                 | 5           |
| <b>Methods</b>            |                                                                                                                     |             |

|    |                            |                      |                                                                                                                                                                                                                                                                      |     |
|----|----------------------------|----------------------|----------------------------------------------------------------------------------------------------------------------------------------------------------------------------------------------------------------------------------------------------------------------|-----|
| 1  | Study design               | <a href="#">#4</a>   | Present key elements of study design early in the paper                                                                                                                                                                                                              | 5   |
| 2  |                            |                      |                                                                                                                                                                                                                                                                      |     |
| 3  |                            |                      |                                                                                                                                                                                                                                                                      |     |
| 4  | Setting                    | <a href="#">#5</a>   | Describe the setting, locations, and relevant dates, including periods of recruitment, exposure, follow-up, and data collection                                                                                                                                      | 5-6 |
| 5  |                            |                      |                                                                                                                                                                                                                                                                      |     |
| 6  |                            |                      |                                                                                                                                                                                                                                                                      |     |
| 7  |                            |                      |                                                                                                                                                                                                                                                                      |     |
| 8  |                            |                      |                                                                                                                                                                                                                                                                      |     |
| 9  |                            |                      |                                                                                                                                                                                                                                                                      |     |
| 10 | Eligibility criteria       | <a href="#">#6a</a>  | Give the eligibility criteria, and the sources and methods of selection of participants.                                                                                                                                                                             | 5   |
| 11 |                            |                      |                                                                                                                                                                                                                                                                      |     |
| 12 |                            |                      |                                                                                                                                                                                                                                                                      |     |
| 13 |                            |                      |                                                                                                                                                                                                                                                                      |     |
| 14 |                            | <a href="#">#7</a>   | Clearly define all outcomes, exposures, predictors, potential confounders, and effect modifiers. Give diagnostic criteria, if applicable                                                                                                                             | 6-7 |
| 15 |                            |                      |                                                                                                                                                                                                                                                                      |     |
| 16 |                            |                      |                                                                                                                                                                                                                                                                      |     |
| 17 |                            |                      |                                                                                                                                                                                                                                                                      |     |
| 18 |                            |                      |                                                                                                                                                                                                                                                                      |     |
| 19 | Data sources / measurement | <a href="#">#8</a>   | For each variable of interest give sources of data and details of methods of assessment (measurement). Describe comparability of assessment methods if there is more than one group. Give information separately for for exposed and unexposed groups if applicable. | 6-7 |
| 20 |                            |                      |                                                                                                                                                                                                                                                                      |     |
| 21 |                            |                      |                                                                                                                                                                                                                                                                      |     |
| 22 |                            |                      |                                                                                                                                                                                                                                                                      |     |
| 23 |                            |                      |                                                                                                                                                                                                                                                                      |     |
| 24 |                            |                      |                                                                                                                                                                                                                                                                      |     |
| 25 |                            |                      |                                                                                                                                                                                                                                                                      |     |
| 26 |                            |                      |                                                                                                                                                                                                                                                                      |     |
| 27 |                            |                      |                                                                                                                                                                                                                                                                      |     |
| 28 |                            |                      |                                                                                                                                                                                                                                                                      |     |
| 29 | Bias                       | <a href="#">#9</a>   | Describe any efforts to address potential sources of bias                                                                                                                                                                                                            | 7   |
| 30 |                            |                      |                                                                                                                                                                                                                                                                      |     |
| 31 |                            |                      |                                                                                                                                                                                                                                                                      |     |
| 32 |                            |                      |                                                                                                                                                                                                                                                                      |     |
| 33 | Study size                 | <a href="#">#10</a>  | Explain how the study size was arrived at                                                                                                                                                                                                                            | 5   |
| 34 |                            |                      |                                                                                                                                                                                                                                                                      |     |
| 35 | Quantitative variables     | <a href="#">#11</a>  | Explain how quantitative variables were handled in the analyses. If applicable, describe which groupings were chosen, and why                                                                                                                                        | 7-8 |
| 36 |                            |                      |                                                                                                                                                                                                                                                                      |     |
| 37 |                            |                      |                                                                                                                                                                                                                                                                      |     |
| 38 |                            |                      |                                                                                                                                                                                                                                                                      |     |
| 39 |                            |                      |                                                                                                                                                                                                                                                                      |     |
| 40 | Statistical methods        | <a href="#">#12a</a> | Describe all statistical methods, including those used to control for confounding                                                                                                                                                                                    | 7-8 |
| 41 |                            |                      |                                                                                                                                                                                                                                                                      |     |
| 42 |                            |                      |                                                                                                                                                                                                                                                                      |     |
| 43 |                            |                      |                                                                                                                                                                                                                                                                      |     |
| 44 | Statistical methods        | <a href="#">#12b</a> | Describe any methods used to examine subgroups and interactions                                                                                                                                                                                                      | 7-8 |
| 45 |                            |                      |                                                                                                                                                                                                                                                                      |     |
| 46 |                            |                      |                                                                                                                                                                                                                                                                      |     |
| 47 |                            |                      |                                                                                                                                                                                                                                                                      |     |
| 48 | Statistical methods        | <a href="#">#12c</a> | Explain how missing data were addressed                                                                                                                                                                                                                              | 6   |
| 49 |                            |                      |                                                                                                                                                                                                                                                                      |     |
| 50 |                            |                      |                                                                                                                                                                                                                                                                      |     |
| 51 |                            |                      |                                                                                                                                                                                                                                                                      |     |
| 52 | Statistical methods        | <a href="#">#12d</a> | If applicable, describe analytical methods taking account of sampling strategy                                                                                                                                                                                       | 6-7 |
| 53 |                            |                      |                                                                                                                                                                                                                                                                      |     |
| 54 |                            |                      |                                                                                                                                                                                                                                                                      |     |
| 55 |                            |                      |                                                                                                                                                                                                                                                                      |     |
| 56 | Statistical methods        | <a href="#">#12e</a> | Describe any sensitivity analyses                                                                                                                                                                                                                                    | 14  |
| 57 |                            |                      |                                                                                                                                                                                                                                                                      |     |
| 58 |                            |                      |                                                                                                                                                                                                                                                                      |     |
| 59 |                            |                      |                                                                                                                                                                                                                                                                      |     |
| 60 |                            |                      |                                                                                                                                                                                                                                                                      |     |

## Results

|    |                  |                                                                                                                                                                                                                                                                                                     |                                                                                              |
|----|------------------|-----------------------------------------------------------------------------------------------------------------------------------------------------------------------------------------------------------------------------------------------------------------------------------------------------|----------------------------------------------------------------------------------------------|
| 1  |                  |                                                                                                                                                                                                                                                                                                     |                                                                                              |
| 2  |                  |                                                                                                                                                                                                                                                                                                     |                                                                                              |
| 3  | Participants     | <a href="#">#13a</a> Report numbers of individuals at each stage of study—eg numbers potentially eligible, examined for eligibility, confirmed eligible, included in the study, completing follow-up, and analysed. Give information separately for for exposed and unexposed groups if applicable. | "n/a. We did no select participants but used data from the German Socio-Economic Panel Study |
| 4  |                  |                                                                                                                                                                                                                                                                                                     |                                                                                              |
| 5  |                  |                                                                                                                                                                                                                                                                                                     |                                                                                              |
| 6  |                  |                                                                                                                                                                                                                                                                                                     |                                                                                              |
| 7  |                  |                                                                                                                                                                                                                                                                                                     |                                                                                              |
| 8  |                  |                                                                                                                                                                                                                                                                                                     |                                                                                              |
| 9  |                  |                                                                                                                                                                                                                                                                                                     |                                                                                              |
| 10 |                  |                                                                                                                                                                                                                                                                                                     |                                                                                              |
| 11 |                  |                                                                                                                                                                                                                                                                                                     |                                                                                              |
| 12 |                  |                                                                                                                                                                                                                                                                                                     |                                                                                              |
| 13 | Participants     | <a href="#">#13b</a> Give reasons for non-participation at each stage                                                                                                                                                                                                                               | "n/a, see above"                                                                             |
| 14 |                  |                                                                                                                                                                                                                                                                                                     |                                                                                              |
| 15 | Participants     | <a href="#">#13c</a> Consider use of a flow diagram                                                                                                                                                                                                                                                 | "n/a, see above"                                                                             |
| 16 |                  |                                                                                                                                                                                                                                                                                                     |                                                                                              |
| 17 |                  |                                                                                                                                                                                                                                                                                                     |                                                                                              |
| 18 | Descriptive data | <a href="#">#14a</a> Give characteristics of study participants (eg demographic, clinical, social) and information on exposures and potential confounders. Give information separately for exposed and unexposed groups if applicable.                                                              | 8                                                                                            |
| 19 |                  |                                                                                                                                                                                                                                                                                                     |                                                                                              |
| 20 |                  |                                                                                                                                                                                                                                                                                                     |                                                                                              |
| 21 |                  |                                                                                                                                                                                                                                                                                                     |                                                                                              |
| 22 |                  |                                                                                                                                                                                                                                                                                                     |                                                                                              |
| 23 |                  |                                                                                                                                                                                                                                                                                                     |                                                                                              |
| 24 |                  |                                                                                                                                                                                                                                                                                                     |                                                                                              |
| 25 |                  |                                                                                                                                                                                                                                                                                                     |                                                                                              |
| 26 | Descriptive data | <a href="#">#14b</a> Indicate number of participants with missing data for each variable of interest                                                                                                                                                                                                | Table 1, p.21                                                                                |
| 27 |                  |                                                                                                                                                                                                                                                                                                     |                                                                                              |
| 28 |                  |                                                                                                                                                                                                                                                                                                     |                                                                                              |
| 29 |                  |                                                                                                                                                                                                                                                                                                     |                                                                                              |
| 30 | Outcome data     | <a href="#">#15</a> Report numbers of outcome events or summary measures. Give information separately for exposed and unexposed groups if applicable.                                                                                                                                               | Figure 1 and 2                                                                               |
| 31 |                  |                                                                                                                                                                                                                                                                                                     |                                                                                              |
| 32 |                  |                                                                                                                                                                                                                                                                                                     |                                                                                              |
| 33 |                  |                                                                                                                                                                                                                                                                                                     |                                                                                              |
| 34 |                  |                                                                                                                                                                                                                                                                                                     |                                                                                              |
| 35 | Main results     | <a href="#">#16a</a> Give unadjusted estimates and, if applicable, confounder-adjusted estimates and their precision (eg, 95% confidence interval). Make clear which confounders were adjusted for and why they were included                                                                       | p. 7; Tables 2-4; p.14                                                                       |
| 36 |                  |                                                                                                                                                                                                                                                                                                     |                                                                                              |
| 37 |                  |                                                                                                                                                                                                                                                                                                     |                                                                                              |
| 38 |                  |                                                                                                                                                                                                                                                                                                     |                                                                                              |
| 39 |                  |                                                                                                                                                                                                                                                                                                     |                                                                                              |
| 40 |                  |                                                                                                                                                                                                                                                                                                     |                                                                                              |
| 41 |                  |                                                                                                                                                                                                                                                                                                     |                                                                                              |
| 42 |                  |                                                                                                                                                                                                                                                                                                     |                                                                                              |
| 43 | Main results     | <a href="#">#16b</a> Report category boundaries when continuous variables were categorized                                                                                                                                                                                                          | 6                                                                                            |
| 44 |                  |                                                                                                                                                                                                                                                                                                     |                                                                                              |
| 45 |                  |                                                                                                                                                                                                                                                                                                     |                                                                                              |
| 46 |                  |                                                                                                                                                                                                                                                                                                     |                                                                                              |
| 47 | Main results     | <a href="#">#16c</a> If relevant, consider translating estimates of relative risk into absolute risk for a meaningful time period                                                                                                                                                                   | "n/a, see above"                                                                             |
| 48 |                  |                                                                                                                                                                                                                                                                                                     |                                                                                              |
| 49 |                  |                                                                                                                                                                                                                                                                                                     |                                                                                              |
| 50 |                  |                                                                                                                                                                                                                                                                                                     |                                                                                              |
| 51 |                  |                                                                                                                                                                                                                                                                                                     |                                                                                              |
| 52 |                  |                                                                                                                                                                                                                                                                                                     |                                                                                              |
| 53 | Other analyses   | <a href="#">#17</a> Report other analyses done—e.g., analyses of subgroups and interactions, and sensitivity analyses                                                                                                                                                                               | 14                                                                                           |
| 54 |                  |                                                                                                                                                                                                                                                                                                     |                                                                                              |
| 55 |                  |                                                                                                                                                                                                                                                                                                     |                                                                                              |
| 56 |                  |                                                                                                                                                                                                                                                                                                     |                                                                                              |
| 57 |                  |                                                                                                                                                                                                                                                                                                     |                                                                                              |

## Discussion



|    |                    |                     |                                                                                                                                                                  |       |
|----|--------------------|---------------------|------------------------------------------------------------------------------------------------------------------------------------------------------------------|-------|
| 1  | Key results        | <a href="#">#18</a> | Summarise key results with reference to study objectives                                                                                                         | 10    |
| 2  |                    |                     |                                                                                                                                                                  |       |
| 3  |                    |                     |                                                                                                                                                                  |       |
| 4  | Limitations        | <a href="#">#19</a> | Discuss limitations of the study, taking into account sources of potential bias or imprecision. Discuss both direction and magnitude of any potential bias.      | 13    |
| 5  |                    |                     |                                                                                                                                                                  |       |
| 6  |                    |                     |                                                                                                                                                                  |       |
| 7  |                    |                     |                                                                                                                                                                  |       |
| 8  |                    |                     |                                                                                                                                                                  |       |
| 9  |                    |                     |                                                                                                                                                                  |       |
| 10 |                    |                     |                                                                                                                                                                  |       |
| 11 | Interpretation     | <a href="#">#20</a> | Give a cautious overall interpretation considering objectives, limitations, multiplicity of analyses, results from similar studies, and other relevant evidence. | 11-13 |
| 12 |                    |                     |                                                                                                                                                                  |       |
| 13 |                    |                     |                                                                                                                                                                  |       |
| 14 |                    |                     |                                                                                                                                                                  |       |
| 15 |                    |                     |                                                                                                                                                                  |       |
| 16 |                    |                     |                                                                                                                                                                  |       |
| 17 |                    |                     |                                                                                                                                                                  |       |
| 18 | Generalisability   | <a href="#">#21</a> | Discuss the generalisability (external validity) of the study results                                                                                            | 14    |
| 19 |                    |                     |                                                                                                                                                                  |       |
| 20 |                    |                     |                                                                                                                                                                  |       |
| 21 |                    |                     |                                                                                                                                                                  |       |
| 22 | <b>Other</b>       |                     |                                                                                                                                                                  |       |
| 23 | <b>Information</b> |                     |                                                                                                                                                                  |       |
| 24 |                    |                     |                                                                                                                                                                  |       |
| 25 |                    |                     |                                                                                                                                                                  |       |
| 26 | Funding            | <a href="#">#22</a> | Give the source of funding and the role of the funders for the present study and, if applicable, for the original study on which the present article is based    | 15    |
| 27 |                    |                     |                                                                                                                                                                  |       |
| 28 |                    |                     |                                                                                                                                                                  |       |
| 29 |                    |                     |                                                                                                                                                                  |       |
| 30 |                    |                     |                                                                                                                                                                  |       |
| 31 |                    |                     |                                                                                                                                                                  |       |

#### Notes:

- 35 • 13a: "n/a. We did not select participants but used data from the German Socio-Economic Panel Study
- 36
- 37
- 38
- 39 • 13b: "n/a, see above"
- 40
- 41 • 13c: "n/a, see above"
- 42
- 43
- 44 • 16c: "n/a, see above"
- 45
- 46 • The STROBE checklist is distributed under the terms of the Creative Commons Attribution License CC-BY. This checklist was completed on 18. June 2020 using
- 47
- 48 <https://www.goodreports.org/>, a tool made by the [EQUATOR Network](#) in collaboration with
- 49
- 50 [Penelope.ai](#)
- 51
- 52
- 53
- 54
- 55
- 56
- 57
- 58
- 59

# BMJ Open

**Life stage-specific trends in educational inequalities in health-related quality of life and self-rated health between 2002 and 2016 in Germany – Findings from the German Socioeconomic Panel Study (GSOEP)**

|                                 |                                                                                                                                                                                                                                                                                                                                                                                                            |
|---------------------------------|------------------------------------------------------------------------------------------------------------------------------------------------------------------------------------------------------------------------------------------------------------------------------------------------------------------------------------------------------------------------------------------------------------|
| Journal:                        | <i>BMJ Open</i>                                                                                                                                                                                                                                                                                                                                                                                            |
| Manuscript ID                   | bmjopen-2020-042017.R1                                                                                                                                                                                                                                                                                                                                                                                     |
| Article Type:                   | Original research                                                                                                                                                                                                                                                                                                                                                                                          |
| Date Submitted by the Author:   | 30-Dec-2020                                                                                                                                                                                                                                                                                                                                                                                                |
| Complete List of Authors:       | Sperlich, Stefanie; Hannover Medical School, Medical Sociology<br>Klar, Marie; Hannover Medical School, Medical Sociology<br>Safieddine, Batoul; Hannover Medical School, Medical Sociology<br>Tetzlaff, Fabian; Hannover Medical School, Medical Sociology<br>Tetzlaff, Juliane; Hannover Medical School, Medical Sociology<br>Geyer, Siegfried; Medizinische Hochschule Hannover, Medical Sociology Unit |
| <b>Primary Subject Heading</b>: | Public health                                                                                                                                                                                                                                                                                                                                                                                              |
| Secondary Subject Heading:      | Health policy                                                                                                                                                                                                                                                                                                                                                                                              |
| Keywords:                       | EPIDEMIOLOGY, PUBLIC HEALTH, SOCIAL MEDICINE                                                                                                                                                                                                                                                                                                                                                               |
|                                 |                                                                                                                                                                                                                                                                                                                                                                                                            |

SCHOLARONE™  
Manuscripts



I, the Submitting Author has the right to grant and does grant on behalf of all authors of the Work (as defined in the below author licence), an exclusive licence and/or a non-exclusive licence for contributions from authors who are: i) UK Crown employees; ii) where BMJ has agreed a CC-BY licence shall apply, and/or iii) in accordance with the terms applicable for US Federal Government officers or employees acting as part of their official duties; on a worldwide, perpetual, irrevocable, royalty-free basis to BMJ Publishing Group Ltd ("BMJ") its licensees and where the relevant Journal is co-owned by BMJ to the co-owners of the Journal, to publish the Work in this journal and any other BMJ products and to exploit all rights, as set out in our [licence](#).

The Submitting Author accepts and understands that any supply made under these terms is made by BMJ to the Submitting Author unless you are acting as an employee on behalf of your employer or a postgraduate student of an affiliated institution which is paying any applicable article publishing charge ("APC") for Open Access articles. Where the Submitting Author wishes to make the Work available on an Open Access basis (and intends to pay the relevant APC), the terms of reuse of such Open Access shall be governed by a Creative Commons licence – details of these licences and which [Creative Commons](#) licence will apply to this Work are set out in our licence referred to above.

Other than as permitted in any relevant BMJ Author's Self Archiving Policies, I confirm this Work has not been accepted for publication elsewhere, is not being considered for publication elsewhere and does not duplicate material already published. I confirm all authors consent to publication of this Work and authorise the granting of this licence.

1  
2  
3 **Life stage-specific trends in educational inequalities in health-related quality of life and**  
4 **self-rated health between 2002 and 2016 in Germany –**  
5 **Findings from the German Socioeconomic Panel Study (GSOEP)**  
6  
7

8 *Stefanie Sperlich<sup>1</sup>, Marie Kristin Klar<sup>1</sup>, Batoul Safieddine<sup>1</sup>, Fabian Tetzlaff<sup>1</sup>, Juliane Tetzlaff<sup>1</sup>,*  
9 *Siegfried Geyer<sup>1</sup>*  
10

11 <sup>1</sup> Hannover Medical School, Medical Sociology, Hannover, Germany  
12  
13  
14  
15

16 Corresponding author:

17 Stefanie Sperlich  
18 Carl-Neuberg Str. 1  
19 30625 Hannover  
20 Tel. 0049 511 532 9310  
21 Fax 0049 511 532 4214  
22 email: [Sperlich.Stefanie@mh-hannover.de](mailto:Sperlich.Stefanie@mh-hannover.de)  
23  
24  
25

26 Email of the other authors:

27 [marie-k.klar@gmx.de](mailto:marie-k.klar@gmx.de)  
28 [Safieddine.Batoul@mh-hannover.de](mailto:Safieddine.Batoul@mh-hannover.de)  
29 [Tetzlaff.Fabian@mh-hannover.de](mailto:Tetzlaff.Fabian@mh-hannover.de)  
30 [Tetzlaff.Juliane@mh-hannover.de](mailto:Tetzlaff.Juliane@mh-hannover.de)  
31 [Geyer.Siegfried@mh-hannover.de](mailto:Geyer.Siegfried@mh-hannover.de)  
32  
33  
34  
35  
36  
37  
38  
39  
40  
41  
42  
43  
44  
45  
46  
47  
48  
49  
50  
51  
52  
53  
54  
55  
56  
57  
58  
59  
60

## ABSTRACT

**Objectives** While evidence suggests persisting health inequalities, research on whether these trends may vary according to different stages of life has rarely been considered. Against this backdrop, we analyzed life stage-specific trends in educational inequalities in health-related quality of life (HRQOL) and poor self-rated health (SRH) for individuals in ‘later working life’ (50-64 years), ‘young seniors’ (65-79 years) and persons of ‘old age’ (80+ years).

**Methods** We used survey data from the German Socio-Economic Panel Study comprising the period from 2002 to 2016. The sample consists of 26,074 respondents (160,888 person years) aged 50 years and older. Health was assessed using the mental and physical component summary scale (MCS / PCS) of the HRQOL questionnaire (SF-12v2) and the single item self-rated health. To estimate educational health inequalities, we calculated the regression-based slope index of inequality (SII) and relative index of inequality (RII). Time trends in inequalities were assessed by the inclusion of a two-way interaction term between school education and time.

**Results** With increasing age, educational inequalities in PCS and poor SRH decreased whereas they rose in MCS. Over time, health inequalities decreased in men aged 65-79 years (MCS<sub>SII</sub>=2.76, 95%CI 0.41-5.11; MCS<sub>RII</sub>=1.05, 95%CI 1.01-1.10; PCS<sub>SII</sub>=2.12, 95%CI -0.27-4.51; PCS<sub>RII</sub>=1.05, 95%CI 1.01-1.10; poor SRH<sub>SII</sub>=-0.10, 95%CI -0.19-0.01; poor SRH<sub>RII</sub>=0.73, 95%CI 0.48-1.13) and among women of that age for MCS (MCS<sub>SII</sub>=2.82, 95%CI 0.16-5.50; MCS<sub>RII</sub>=1.06, 95%CI 1.01-1.12). In contrast, health inequalities widened in the ‘later working life’ among women (PCS<sub>SII</sub>=-2.98, 95%CI -4.86- -1.11; PCS<sub>RII</sub>=0.94, 95%CI 0.90-0.98; poor SRH<sub>SII</sub>=0.07, 95%CI 0.00-0.14) while remained largely stable at old age for both genders.

**Conclusions** We found distinctive patterns of health inequality trends depending on gender and life stage. Our findings suggest to adopt a differentiated view on health inequality trends and to pursue research that explores their underlying determinants.

**Keywords:** health inequality, life stages, trend, temporal change

### Strengths and limitations of this study

- This is one of the first studies investigating trends in educational inequalities in HRQOL and poor SRH according to different stages of life
- We used data from a large nationally representative survey, and our study considered trends over a period of 15 years using a validated measure of HRQOL
- The key finding of life stage-specific trends in educational inequality in health are open to different interpretation and might be the result of cohort- as well as period-effects.
- Further studies are warranted in order to replicate our findings and to provide clues to the drivers behind the life stage-specific trends.

## INTRODUCTION

Indicators of subjective health like self-rated health (SRH) and health-related quality of life (HRQOL) complement mortality and morbidity as measures used in tracking trends in population health<sup>1</sup>. Previous studies on temporal change in subjective health have shown conflicting results indicating both improvements<sup>2-4</sup> as well as stable trends or even deterioration of self-rated health over time.<sup>5-7</sup> Similarly, recent studies in Germany revealed heterogeneous findings with some suggesting that the prevalence of poor SRH did not change substantially over time<sup>8 9</sup> while others pointing towards enhancements in HRQOL and functional health.<sup>10 11</sup>

The existence of socioeconomic inequalities in mortality and morbidity is well documented<sup>12-14</sup> and the social gradient in health has also been shown to be present for SRH and HRQOL.<sup>15 16</sup> Recent studies from Europe and other western countries indicate that the self-rated health gap between lower and higher socioeconomic status (SES) groups remained largely the same or has even widened over time. For instance, Hu et al.<sup>17</sup>, who analyzed trends in socioeconomic inequalities in 17 European countries, found that absolute inequalities in SRH remained unchanged while relative inequalities increased between 1990 and 2010. Lahelma et al.<sup>18</sup> reported that educational inequalities in SRH in Finland largely remained constant between 1979 and 2014. Similarly, the study by Hanibuchi et al.<sup>19</sup> revealed stable trends in socioeconomic inequalities in SRH in Japan between 2000 and 2010. Analyzing trends in quality-adjusted life expectancy between 2001 and 2011 for the Netherlands, Gheorghe et al.<sup>20</sup> summarized that the largest increases were found for higher educated individuals, which resulted in a widening health gap by education. A similar pattern was observed for Germany where Lampert et al.<sup>16</sup> found increasing income inequalities in the prevalence of poor SRH between 1994 and 2014. Based on the data of repeated cross-sectional surveys between 2003 and 2012, the study by Wachtler et al.<sup>9</sup> revealed stable absolute and relative inequalities in SRH between 2003 and 2012.

The life-course perspective on social inequalities in health suggests that while social disparities persist across the life course, the magnitude of these differences may vary according to the stage in the life phase. Three opposing theoretical perspectives have been proposed about the way in which health inequality may evolve across the life course. The *cumulative advantage/disadvantage hypothesis* claims that the positive effect of SES on health increases over the life course and therefore health inequality would widen at older ages.<sup>21</sup> In contrast, the *status maintenance hypothesis* states that the social health gradient

1  
2  
3 remains largely constant across the life course since the social positions attained in early  
4 adulthood do not substantially change in later life.<sup>22</sup> Finally, the *age-as-leveler hypothesis*  
5 posits that health inequality decreases at older ages due to different factors such as the  
6 selection of more healthy people due to mortality.<sup>23</sup> Previous studies revealed contradictory  
7 findings supporting the cumulative advantage/disadvantage hypothesis,<sup>24 25</sup> as well as the  
8 status maintenance<sup>25 26</sup> and the age-as-leveler<sup>27</sup> assumptions.  
9

10  
11  
12  
13  
14 Whereas numerous studies on social inequalities in health have adopted a life course  
15 approach<sup>28 29</sup>, a life stage-specific perspective on determinants of health inequalities has so far  
16 been neglected. In one of the few existing studies, San Sebastian et al.<sup>30</sup> analyzed the effects  
17 of social determinants in health at four different life stages. They found that the effects of  
18 specific adversities depend on the life course stage and concluded that life course needs to be  
19 taken into consideration for tackling health inequalities. In a similar vein, recent studies  
20 suggest that the temporal trends in SRH and functional disability also differ according to the  
21 life stage considered.<sup>31-35</sup>  
22  
23  
24  
25  
26  
27

28  
29 In medical sociological research, it has been established to distinguish between material,  
30 psychosocial and behavioral pathways in explaining social inequalities in health.<sup>36-38</sup> While  
31 the material explanation refers to structural living conditions, the psychosocial pathway  
32 includes a wide range of social and personal resources as well as psychosocial stressors.  
33 Finally, the behavioral explanation considers a variety of health-related behaviors that are  
34 strongly linked with the material and psychosocial pathway.<sup>39</sup> In order to explain trends in  
35 health inequality, a dynamic perspective on these explanations needs to be employed that take  
36 medical, demographic, social and economic change into account. This approach represents a  
37 substantial challenge since health inequalities are the result of a number of interacting factors.  
38 In addition, a life-stage specific approach would appear appropriate as the consequences of  
39 medical and social change may have different implications according to people's phase in life.  
40 However, research on whether trends in health inequalities may vary according to different  
41 stages of life is still rare. Using this as a starting-point, the aim of this study was to analyze  
42 life stage-specific time trends in educational inequalities in HRQOL and poor SRH for  
43 individuals in 'later working life' (50-64 years), among 'young seniors' (65-79 years) and  
44 persons of 'old age' (80+ years). We focused on life stage-specific rather than age-specific  
45 effects in order to emphasize that social and demographic change may have altered people's  
46 living conditions differently depending on their stage in the life course and the specific  
47  
48  
49  
50  
51  
52  
53  
54  
55  
56  
57  
58  
59  
60



1  
2  
3 psychosocial resources and burdens associated therewith. In more detail, the study was guided  
4 by the following research questions:

- 5  
6  
7 1. Does the extent of educational inequalities in HRQOL and poor SRH vary between  
8 different life stages?  
9  
10 2. How are HRQOL and poor SRH evolving over time in each of the life stages  
11 according to educational level?  
12  
13 3. Are there diverging trends of educational inequalities in health for the different life  
14 stages?  
15  
16  
17  
18  
19

## 20 **METHODS**

21 Our paper follows the “Strengthening the Reporting of Observational Studies in  
22 Epidemiology (STROBE)” guidelines.<sup>40</sup>  
23  
24  
25

### 26 **Data source**

27  
28 This study is based on data from the German Socio-Economic Panel Study (GSOEP V.31).  
29 The GSOEP is the largest representative annual survey of German individuals based on a  
30 random sample of private households. Conducted from 1984 onwards the study covers nearly  
31 11,000 households and 30,000 individuals each year. The GSOEP population is regularly  
32 updated with new survey samples to account for changes in the German population and for  
33 compensating loss-to-follow-up. Data were collected using different questionnaires for  
34 individuals, households or specific subgroups by face-to-face interviews. Further information  
35 on GSOEP can be derived from Frick et al.<sup>41</sup> The information used for this study includes  
36 school education, income, marital status, nationality as well as SRH and HRQOL as health  
37 outcomes. While SRH was assessed annually, HRQOL has been measured every two years  
38 since 2002. We focused on men and women aged 50 and above since limitations in physical  
39 wellbeing are rare in younger subjects.  
40  
41  
42  
43  
44  
45  
46  
47  
48

49 For the physical and the mental components of HRQOL, in total 23,878 respondents (11,553  
50 men / 12,325 women) were observed 81,676 times (39,159 men / 42,517 women) between  
51 2002 and 2016, corresponding to an average participation in 3.4 waves (min. = 1/ max. = 8).  
52 With respect to SRH, a total of 26,074 respondents (12,665 men / 13,409 women) were  
53 observed 160,888 times (77,028 men / 83,860 women), corresponding to an average  
54 participation in 6.1 waves in men and 6.3 in women (min. = 1/ max. = 15). We used cross-  
55 sectional weights which are assumed to produce a nationally representative sample.<sup>42</sup> The  
56  
57  
58  
59  
60

1  
2  
3 proportion of missing values varied between 0 and 2.6%. Respondents with missing  
4 information were excluded from analysis (Table 1).  
5  
6  
7

### 8 Life stage-approach 9

10 According to our life stage-approach, we assigned the population to three different life stages,  
11 namely 'later working life' (50-64 years), 'young seniors' (65-79 years) and 'old age' (80+  
12 years).  
13  
14  
15

### 16 Patient and public involvement 17

18 The study is based on anonymized data from the German Socio-Economic Panel Study that is  
19 conducted by the German Institute for Economic Research (DIW). No patients were involved  
20 in the design of the study, nor were they involved in the recruitment to and the conduct of the  
21 study. In addition, no consent to participate was required and there are no plans to disseminate  
22 the results of the research to study participants.  
23  
24  
25  
26  
27  
28

### 29 Measures 30

#### 31 *Self-rated health (SRH)* 32

33 SRH is one of the most frequently used health measures in public health and has been proved  
34 to be a reliable indicator of healthcare services utilization<sup>43</sup>, functional limitations<sup>44</sup> and  
35 mortality.<sup>43 45</sup> In our study, SRH was measured by the question "How would you assess your  
36 current state of health?" comprising the five response categories: 'very good', 'good',  
37 'satisfactory', 'poor' and 'bad'. The responses were dichotomized into 'poor health' (last two  
38 categories) and better health (first three categories).  
39  
40  
41  
42  
43  
44

#### 45 *Health-related quality of life (HRQOL)* 46

47 HRQOL is a multidimensional concept that incorporates physical, emotional and social  
48 dimensions of health.<sup>46</sup> In this study, HRQOL was assessed using a slightly modified version  
49 of the second version of the 12-Item Short Form Health Survey (SF-12v.2).<sup>47</sup> The SF-12v.2  
50 includes 12 items making up eight scales: physical functioning, role limitations due to  
51 physical problems, bodily pain, general health, vitality, social functioning, role limitation due  
52 to emotional problems and perceived mental health. Based on these items a physical  
53 component summary (PCS) score and a mental component summary (MCS) score were  
54 calculated. Values are standardized to a national norm (GSOEP population in 2004) ranging  
55  
56  
57  
58  
59  
60

1  
2  
3 from 0 to 100 points with a mean of 50 points and a standard deviation of 10 points. A higher  
4 score corresponds to a better health status.

### 6 *Education*

8 Educational level was classified into 'low', 'intermediate' and 'high' according to the number  
9 of years of schooling. All individuals with a maximum of nine years of schooling  
10 (secondary education) were assigned to the low educational group that includes also subjects  
11 without a school leaving certificate due to early school leaving. The intermediate education  
12 group consists of those with 10 years of schooling corresponding to a  
13 comprehensive school certificate. Subjects with at least twelve years' schooling were assigned  
14 to the high educational group corresponding to German secondary school leaving certificate.  
15 For analyzing time trends, these educational groups were transformed into cumulative rank  
16 probabilities (ridit scores).  
17  
18  
19  
20  
21  
22  
23  
24  
25

### 26 *Time trend*

27 Changes in SRH and HRQOL between 2002 and 2016 were assessed by a continuous time-  
28 trend variable with a range of 0 to 1 for the entire study period. The first year of observation  
29 (2002) is coded as 0 and the last year (2016) as 1, with the years in between getting fractional  
30 values according to the following formula:  $[(\text{year}-2002) / (2016-2002)]$ .  
31  
32  
33  
34  
35

### 36 *Confounders*

37 Socio-demographic characteristics such as migration background, marital status and income  
38 level might be correlated with health outcomes as well as educational level. Shift in the  
39 compositions of these factors due to selective panel attrition might be a possible source of  
40 bias for the magnitude of health trends observed. Hence, in all analyses we adjusted for  
41 nationality, marital status and equivalized net income. To take account of possible shifts in  
42 age composition over time within the three life stages, we additionally adjusted for age in  
43 each of the models.  
44  
45  
46  
47  
48  
49  
50

### 51 *Statistical analysis*

52 We performed logistic and linear regression models to test for time-effects on poor SRH and  
53 HRQOL, respectively. We accommodated the statistical dependence among the repeated  
54 observations by calculating population-averaged effects using generalized equation estimating  
55 (GEE) for logistic and linear regression.<sup>48</sup> We used this regression technique since our aim  
56 was to analyze population-averaged and not subject-specific time-effects which would be  
57  
58  
59  
60

1  
2  
3 more accurately estimated by random-effect models.<sup>49</sup> In addition to odds ratios (OR) we  
4 reported predicted means and probabilities (margins at means) giving the time trends a more  
5 substantial interpretation.  
6  
7

8 We calculated the Relative Index of Inequality (RII) and the Slope Index of Inequality (SII) as  
9 recommended by Mackenbach and Kunst.<sup>50</sup> These indices are both regression-based and take  
10 the entire distribution of a socio-economic variable as well as the size of the socio-economic  
11 groups into account. In our study, the RII can be interpreted as the estimated ratio (poor SRH:  
12 prevalence ratio, HRQOL: ratio of mean values) between subjects with the lowest and those  
13 with the highest educational level. In contrast, the SII quantifies the magnitude of absolute  
14 health inequality and can be interpreted as the difference in the prevalence (poor SRH) or in  
15 the mean (HRQOL) between individuals at the top and bottom of the educational hierarchy. In  
16 order to calculate RII and SII, the educational groups of each survey year and for each stage  
17 of life (separated for men and women) were transformed into cumulative rank probabilities  
18 ('ridit scores') ranging from 0 (highest level of education) to 1 (lowest level of education).  
19 For computing the ridit-scores, population weights were employed to match the official  
20 population statistics. As proposed, we used a logarithmic link function to calculate the RII and  
21 an identity link function to calculate the SII by using clustered variance estimators.<sup>50</sup>  
22 Temporal trends in educational inequalities were assessed by the inclusion of a two-way  
23 interaction term between educational levels (ridit-score) and the time-trend variable. The  
24 models were adjusted for possible confounders (see above) and the main effects of education  
25 and time. For MCS and PCS where higher scores reflect better health, values of RII <1 and  
26 SII <0 indicate widening educational inequalities while RII >1 and SII >0 point to decreasing  
27 inequalities over time. The opposite interpretation applies for poor SRH where RII >1 and SII  
28 >0 indicate increasing health inequality over time. All analyses were performed with STATA  
29 v13.1.  
30  
31  
32  
33  
34  
35  
36  
37  
38  
39  
40  
41  
42  
43  
44  
45  
46  
47

## 48 RESULTS

49 The weighted sample characteristics, separated by time periods, are presented in Table 1.  
50 Between 2002 and 2016, the proportion of subjects with low educational attainment decreased  
51 while the proportions of those with higher educational levels increased. The distribution of  
52 age, gender, income, nationality and cohabitation remained largely stable over time.  
53  
54

55 Women as compared with men reported consistently lower levels of MCS and PCS as well as  
56 higher proportions of poor SRH at almost each time point (Figure 1 and 2). Men and women  
57 in the later working life both showed the highest levels of PCS and lowest proportions of poor  
58  
59  
60

1  
2  
3 SRH. Health status for these indicators gradually declined in the subsequent life stages with  
4 poorest subjective health observed at old age. For both genders, in contrast, levels of MCS  
5 were lowest in the later working life and tended to improve with age.  
6  
7

### 8 9 10 *The extent of educational inequalities in HRQOL and SRH according to life stages*

11 Educational inequalities in mean scores of PCS and proportions of poor SRH to the  
12 disadvantage of lower educated subjects were observed for both genders and all life stages  
13 considered. These inequalities were most pronounced in later working life and declined with  
14 age. In contrast, for both men and women, educational disparities in MCS were not significant  
15 in later working life but widened with age (Table 2).  
16  
17  
18  
19  
20  
21

### 22 *Health trends in different life stages according to educational level*

23 Among men in the later working life hardly any significant temporal health change was  
24 observed in any of the educational groups. The only exception was that MCS significantly  
25 improved by 1.01 points (95%CI 0.04 to 1.98,  $p < 0.05$ ) among highly educated men (Table 3  
26 and Figure 1). Stronger temporal fluctuations in MCS and PCS were observed in the life stage  
27 of old age, however, no systematic linear health trend was found in any of the educational  
28 groups. By contrast, health in the life stage of young seniors improved more strongly in low  
29 educated as compared with highly educated men. This was observed for all of the three health  
30 indicators considered. For example, among low educated men MCS and PCS increased by  
31 1.82 points (95%CI 0.80 to 2.85,  $p < 0.001$ ) and 1.56 points (95%CI 0.56 to 2.56,  $p < 0.01$ ),  
32 respectively, while no significant improvements for MCS and PCS were found among highly  
33 educated men (Table 3). Similar, in men with low educational level, odds of poor SRH  
34 reduced by 31% (OR=0.69, 95%CI 0.57 to 0.83,  $p < 0.001$ ) while declined only by 26%  
35 (OR=0.74, 95%CI 0.53 to 1.08,  $p < 0.10$ ) in their high educated counterparts.  
36  
37  
38  
39  
40  
41  
42  
43  
44  
45  
46

47 Among women, a similar pattern was found, indicating that subjective health in young seniors  
48 increased more pronounced in those with low as compared to higher educational attainment  
49 (Table 3). In later working life, by contrast, PCS and SRH deteriorated among low educated  
50 women while remained largely stable for the higher educated ones. At this life stage, PCS  
51 declined by 1.65 points (95%CI -2.65 to -0.66,  $p < 0.001$ ) in low educated women while  
52 slightly improved by 0.36 points (95%CI -0.78 to 1.49,  $p > 0.10$ ) in women with high  
53 education. In addition, odds of poor SRH increased by 33% (OR=1.33; 95%CI 1.12 to 1.59,  
54  $p < 0.05$ ) in low educated women while marginally decreased by 3% (OR=0.97; 95%CI 0.75 to  
55 1.27,  $p > 0.10$ ) for the high educated ones. Similarly to the results of their male counterparts,  
56  
57  
58  
59  
60

1  
2  
3 no systematic linear health trend was found among old age women in any of the educational  
4 groups.  
5  
6

### 8 *Life stage-specific trends in relative (RII) and absolute (SII) educational inequalities*

9  
10 In terms of relative (RII) and absolute (SII) educational inequalities, no significant temporal  
11 change in HRQOL and SRH was found among men in later working life as well as in old age  
12 (Table 4). In contrast, educational inequalities decreased over time among male young  
13 seniors. As indicated by the significant interaction terms ( $MCS_{RII} = 1.05$ , 95%CI 1.01 to 1.10,  
14  $p < 0.05$  /  $PCS_{RII} = 1.05$ , 95%CI 1.00 to 1.11,  $p < 0.10$ ), HRQOL improved more strongly in the  
15 lowest as compared with the highest educational group. Expressed in absolute terms (SII),  
16 educational inequalities between low and highly educated men were reduced by 2.76 points  
17 (95%CI 0.41 to 5.11,  $p < 0.05$ ) for MCS and 2.12 points (95%CI -0.27 to 4.51,  $p < 0.10$ ) for  
18 PCS. The same pattern was found for poor SRH where the opposite interpretation applies (RII  
19  $< 1$  and SII  $< 0$  indicating reduction of health inequality), reaching statistical significance for  
20 SII only.  
21  
22

23  
24 Educational inequalities among ‘young seniors’ also decreased in women. However, this was  
25 restricted to MCS where absolute differences between the highest and lowest educational  
26 group were reduced over time by 2.82 points (95%CI 0.16 to 5.50,  $p < 0.05$ ). The contrary  
27 pattern was found in the life stage of ‘later working life’ where educational inequality in  
28 women increased in relative and absolute terms for PCS and poor SRH. Similar to men, no  
29 significant change in educational inequalities was observed for the life stage of ‘old age’.  
30  
31  
32  
33  
34  
35  
36  
37  
38  
39

## 40 **DISCUSSION**

41  
42 The aim of this study was to analyze trends in educational inequalities in HRQOL and poor  
43 SRH between 2002 and 2016 in the life stages of ‘later working life’ (50-64 years), ‘young  
44 seniors’ (65-79 years) and ‘old age’ (80+ years). First, we found that educational inequalities  
45 in poor SRH and in the physical component of HRQOL decreased with subsequent life stages  
46 while the opposite applied to the mental component of HRQOL. Our findings suggest that the  
47 way in which health inequality evolves across the life stages depend on the health indicator  
48 considered. This corresponds to previous studies who found different patterns of health  
49 inequalities across ages for different health indicators.<sup>25 51 52</sup> Our main finding was that the  
50 temporal development of health inequality differed according to the stage of life. While  
51 among young seniors health inequalities declined for both genders, a significant increase was  
52 found among women in later working life.  
53  
54  
55  
56  
57  
58  
59  
60



### *The extent of educational inequalities in HRQOL and SRH according to different life stages*

In the life stage of 'later working life' no educational inequalities were found for MCS in both genders. This is in line with the finding by Moor et al.<sup>8</sup> who likewise found no social gradient in MCS among subjects aged 30 to 49 years. They supposed that this may be due to the specific life phase in which career building coincides with family demands, affecting subjects of all educational levels and thus equalizing educational differences in HRQOL with respect to mental health. Our findings indicate that educational inequalities in MCS to the disadvantage of lower educated subjects first emerged at retirement age, supporting the assumption that during working life, the mental health component of HRQOL is strongly influenced by work-related demands and time constraints acting independently of educational attainment. Furthermore, our results suggest that high educated women may benefit more from retirement age which supports the cumulative advantage/disadvantage hypothesis claiming that the positive effect of socioeconomic status on health increases over the life course. In contrast, we found educational inequalities in the physical health component of HRQOL as well as in poor SRH to be strongest in the later working life and declining with age. This finding supports the age-as-leveler hypothesis positing that health inequality decreases at older ages. One possible explanation for declining educational inequalities over the life stages in physical health could be that biological frailty in older age may contribute to an intensified health decline of individuals with high SES leading to a reduction of health inequalities. In addition, retirement might bring an end to inequalities in the work context with respect to work-related physical strain. Finally, with age increasing mortality selection in the general population as well as selective panel attrition may have contributed to the selection of more healthy individuals with the consequence that the association between education and health appeared to be weaker at older ages.

### *Life stage-specific trends in educational health inequalities*

Previous research on trends in health inequalities has mainly focused on the entire adult population and has not adequately taken into consideration that health trends may vary across different stages of life. In line with this research, we found educational inequalities in health to be largely stable over time when considering individuals of all ages. However, the differentiated analysis according to life stages revealed distinctive patterns of health inequality trends. The study conducted by Granström et al.<sup>53</sup> is one of the few that adopted a life stage-specific view on health inequality trends. Their findings indicate that the increase in



1  
2  
3 health inequality among women was mainly due to growing inequalities in early adulthood  
4 between 25 and 34 years of age. The findings of our study on subjects aging 50 years and  
5 older revealed a reduction of educational health inequality in the life stage of young seniors,  
6 holding for both genders. In contrast, health inequalities in later working life widened among  
7 women and remained largely stable for both genders at old age. These findings support the  
8 assumption that the consequences of medical and social change may have different  
9 implications according to people's phase in life. For example, the decline in health inequality  
10 among young seniors as found in our study might be attributed to medical progress in the  
11 prevention and treatment of diseases that appears to be particularly relevant at this life stage  
12 where chronic conditions gained in importance. While medical advances bring benefit to all  
13 educational groups, lower educated persons may benefit more as they are more vulnerable to  
14 chronic conditions what might partly explain the reduction of health inequality at this age. In  
15 the same way, the increase in work-related stress in recent years in Germany<sup>33</sup> does not apply  
16 to retired persons, which might partly explain the greater health improvement among young  
17 seniors as found in a previous study.<sup>34</sup> The same reasoning may apply to the reduction of the  
18 educational health gap among young seniors found in this study. Seen from that perspective,  
19 educational differences in subjective health may decrease at this age as retirement bring an  
20 end to the unequal work-related burden caused by socially stratified working conditions that  
21 might have become even harder for low educated individuals. In contrast, changes in  
22 employment rates over the last decades might have contributed to the increasing health  
23 inequalities among women in later working life. In a previous study we found an overall  
24 increase in women's perceived rates of good self-rated health at this age that was more  
25 pronounced as compared with men.<sup>34</sup> Following the idea by Aguilar-Palacio et al.<sup>54</sup> it was  
26 postulated that the increasing presence of women in the labor force might have contributed to  
27 the reduction of the gender gap in SRH. The finding of this study suggests that not all women  
28 benefited equally from the increase in employment rates. It might be possible that higher  
29 educated women have benefited more as their working activities provide higher levels of  
30 autonomy and rewards which proved to be significant health-promoting resources.<sup>55 56</sup>  
31 Conversely, employment may pose higher burdens to low educated women that would explain  
32 the rise in health inequalities found among women of later working life. In addition to these  
33 explanations, different trends in health-related behaviors might have contributed to the life  
34 stage-specific trends in health inequality. For example, recent findings suggest that probability  
35 of obesity increased particularly for younger cohorts while the rise was less pronounced  
36 among older ones.<sup>57 58</sup> Finally, it is worth noting that while the educational expansion over the  
37  
38  
39  
40  
41  
42  
43  
44  
45  
46  
47  
48  
49  
50  
51  
52  
53  
54  
55  
56  
57  
58  
59  
60

1  
2  
3 past decades has affected all ages, the implications might have been very different depending  
4 on the life stage. While today low educated individuals in Germany represent a minority  
5 among younger cohorts, they are still forming the majority of older cohorts.<sup>59</sup> Hence, low  
6 educated individuals in younger ages may increasingly form a vulnerable subgroup with a  
7 high health-risk which is not the case for the elderly. These varying implications of the  
8 educational expansion for different cohorts need to be considered when exploring life stage-  
9 specific trends in health inequality.  
10  
11  
12  
13  
14  
15  
16

### 17 *Strength and limitations*

18  
19 The strength of this study is the large sample size representing the German population  
20 allowing for stratification according to gender and different stages of life. We used different  
21 indicators of subjective health giving the findings a more substantial interpretation. In  
22 addition, we used established instruments to ensure high construct validity for measuring  
23 subjective health. We enhanced the validity of trend analysis by using measures of both  
24 absolute and relative health inequalities. We performed further time trend analyses not  
25 adjusting for potential confounders and found the time trends determined to be very robust.  
26  
27  
28  
29  
30  
31

32 However, this study has also limitations worth noting. Even though sampling weights were  
33 used, the existence of sampling bias cannot be completely ruled out since a full match of the  
34 official population statistics is not absolutely guaranteed. Selection bias could be due to the  
35 exclusion of the institutionalized population as well as persons who could not take part in the  
36 survey for health reasons. Furthermore, there is a possible existence of a reporting bias since  
37 the outcome and the independent variables are self-reported.  
38  
39  
40  
41  
42

43 As Moor et al.<sup>8</sup> pointed out, the effect size in the extent of health inequalities depends on the  
44 cut-off point chosen for the categorization of poor health. They conducted a sensitivity  
45 analysis, in which 'satisfactory' was part of the reference category 'good health' as it was in  
46 this study. Compared with the alternative in which 'satisfactory' was part of the category  
47 'rather poor health', they found the relative risk in low educated people to assess their health  
48 as poor to be higher while the absolute difference revealed to be smaller. This finding  
49 suggests that the results obtained depend on the way of classification poor health, indicating  
50 that the generalizability of our study results may be limited.  
51  
52  
53  
54  
55  
56

57 In addition, our key finding of life stage-specific trends in educational health inequality  
58 cannot be clearly attributed to either cohort- or period-effects. While sociological literature  
59 considers a cohort-effect as the sum of all unique exposures experienced by the cohort from  
60

1  
2  
3 birth, a period-effect result from external factors that equally affect all age groups at a  
4 particular calendar time.<sup>60</sup> In our study, we found subjective health steadily improving  
5 particularly among lower educated young seniors not fitting in with the idea of an exclusive  
6 cohort- or period-effect. Instead, our results speak in favor of a gradual transition that might  
7 be better described with the continuing progress of social and economic change that may have  
8 different implications depending on the stage of people's lives.  
9

10  
11  
12  
13  
14 Lastly, since the observation period of 15 years in our study is relatively short, conclusions  
15 about the further development of health inequality in different life stages cannot be derived  
16 from our findings. In particular, it is not foreseeable whether the positive trend of narrowed  
17 health inequality among young seniors, if confirmed in further studies will continue in the  
18 future.  
19  
20  
21  
22

### 23 24 *Conclusions*

25  
26 We found distinctive patterns of health inequality trends in HRQOL and SRH for different  
27 life stages and according to gender. While educational disparities declined among young  
28 seniors in both genders, they widened in later working life exclusively among women. The  
29 results emphasize the need for a life stage-approach when analyzing health inequality trends  
30 in order to capture varying effects of social change on different life stages. In addition, our  
31 findings suggest that social change may have different implications for men and women,  
32 indicating that gender is another core inequality dimension that may interact with life stage  
33 and social status. Moving from the description to the explanation of health trends would be an  
34 important next step to develop targeted political interventions aiming at tackling inequality in  
35 health. For this purpose it would be beneficial to adopt an intersectional framework that includes  
36 age, gender and social status as interconnected and time-varying dimensions of health  
37 inequalities.  
38  
39  
40  
41  
42  
43  
44  
45  
46  
47

### 48 **Competing interests**

49 None declared.  
50  
51

### 52 **Ethics**

53  
54  
55 Ethics Board approval was not required as we only conducted analyses of completely  
56 anonymized SOEP-datasets.  
57  
58  
59  
60

### **Funding statement**

1  
2  
3 This paper was supported by the DFG (German Research Foundation), grant number GE  
4 1167/15-1.  
5  
6  
7

### 8 **Competing interest statement**

9  
10 All authors have read and understood the BMJ Group policy on declaration of interests and  
11 declared that they have no conflict of interest.  
12  
13

### 14 **Ethical approval**

15 Approval from the ethics committee is not required as this study using pre-existing and de-  
16 identified data.  
17  
18  
19

### 20 **Author Contributions**

21  
22 SS has made substantial contributions to the concept and design and conducted the statistical  
23 analyses. BS, FT, JT, MKK and SG participated in the design of the study and helped to draft  
24 the manuscript. They have also been involved in revising the manuscript critically for  
25 important intellectual content. All authors read and approved the final manuscript.  
26  
27  
28  
29  
30  
31

### 32 **Data availability statement**

33  
34 The raw data were drawn from the German Socio-Economic Panel Study (GSOEP 21 V.31).  
35 The datasets used are available from the corresponding author on reasonable request. German  
36 data privacy laws necessitate that all users sign a data user contract with DIW Berlin.  
37  
38  
39  
40  
41  
42  
43  
44  
45  
46  
47  
48  
49  
50  
51  
52  
53  
54  
55  
56  
57  
58  
59  
60

## REFERENCES

1. Bombak AE. Self-rated health and public health: a critical perspective. *Frontiers in public health* 2013;1:15-15. doi: 10.3389/fpubh.2013.00015
2. Parker MG, Thorslund M. Health trends in the elderly population: getting better and getting worse. *Gerontologist* 2007;47(2):150-8. doi: 10.1093/geront/47.2.150 [published Online First: 2007/04/19]
3. Roqué IFM, Salvà A, Bolívar I, et al. [Trends in self-perceived health and chronic disability in the elderly Spanish population: evolution between years 1993 and 2006]. *Med Clin (Barc)* 2012;139(7):284-9. doi: 10.1016/j.medcli.2011.06.021 [published Online First: 2011/10/22]
4. Põld M, Pärna K, Ringmets I. Trends in self-rated health and association with socioeconomic position in Estonia: data from cross-sectional studies in 1996-2014. *Int J Equity Health* 2016;15(1):200. doi: 10.1186/s12939-016-0491-9 [published Online First: 2016/12/10]
5. Zack MM, Moriarty DG, Stroup DF, et al. Worsening trends in adult health-related quality of life and self-rated health-United States, 1993-2001. *Public Health Rep* 2004;119(5):493-505. doi: 10.1016/j.phr.2004.07.007 [published Online First: 2004/08/18]
6. Galenkamp H, Braam AW, Huisman M, et al. Seventeen-year time trend in poor self-rated health in older adults: changing contributions of chronic diseases and disability. *Eur J Public Health* 2013;23(3):511-7. doi: 10.1093/eurpub/cks031 [published Online First: 2012/04/12]
7. Mairey I, Bjerregaard P, Brønnum-Hansen H. Gender difference in health expectancy trends in Greenland. *Scand J Public Health* 2014;42(8):751-8. doi: 10.1177/1403494814550174 [published Online First: 2014/09/28]
8. Moor I, Günther S, Knöchelmann A, et al. Educational inequalities in subjective health in Germany from 1994 to 2014: a trend analysis using the German Socio-Economic Panel study (GSOEP). *BMJ Open* 2018;8(6):e019755. doi: 10.1136/bmjopen-2017-019755 [published Online First: 2018/06/10]
9. Wachtler B, Hoebel J, Lampert T. Trends in socioeconomic inequalities in self-rated health in Germany: a time-trend analysis of repeated cross-sectional health surveys between 2003 and 2012. *BMJ Open* 2019;9(9):e030216. doi: 10.1136/bmjopen-2019-030216 [published Online First: 2019/09/29]
10. Ellert U, Kurth B-M. Gesundheitsbezogene Lebensqualität bei Erwachsenen in Deutschland: Robert Koch-Institut, 2013.
11. Trachte F, Sperlich S, Geyer S. [Compression or expansion of morbidity? Development of health among the older population]. *Z Gerontol Geriatr* 2015;48(3):255-62. doi: 10.1007/s00391-014-0644-7 [published Online First: 2014/05/02]
12. Marmot M, Bell R. Social inequalities in health: a proper concern of epidemiology. *Ann Epidemiol* 2016;26(4):238-40. doi: 10.1016/j.annepidem.2016.02.003 [published Online First: 2016/04/17]
13. Marmot M. The Health Gap: The Challenge of an Unequal World: the argument. *Int J Epidemiol* 2017;46(4):1312-18. doi: 10.1093/ije/dyx163 [published Online First: 2017/09/25]
14. Bopp M, Mackenbach JP. [Death is a respecter of persons : 30 years of research comparing European countries regarding social inequality in mortality]. *Z Gerontol Geriatr* 2019;52(2):122-29. doi: 10.1007/s00391-019-01530-6 [published Online First: 2019/03/16]

15. Mackenbach JP, Stirbu I, Roskam AJ, et al. Socioeconomic inequalities in health in 22 European countries. *N Engl J Med* 2008;358(23):2468-81. doi: 10.1056/NEJMsa0707519 [published Online First: 2008/06/06]
16. Lampert T, Schmidtke C, Borgmann L-S, et al. Subjektive Gesundheit bei Erwachsenen in Deutschland. *Journal of Health Monitoring* 2018(3):64--71. doi: <http://dx.doi.org/10.17886/RKI-GBE-2018-068>
17. Hu Y, van Lenthe FJ, Borsboom GJ, et al. Trends in socioeconomic inequalities in self-assessed health in 17 European countries between 1990 and 2010. *J Epidemiol Community Health* 2016;70(7):644-52. doi: 10.1136/jech-2015-206780 [published Online First: 2016/01/21]
18. Lahelma E, Pietiläinen O, Pentala-Nikulainen O, et al. 36-year trends in educational inequalities in self-rated health among Finnish adults. *SSM - population health* 2019;9:100504-04. doi: 10.1016/j.ssmph.2019.100504
19. Hanibuchi T, Nakaya T, Honjo K. Trends in socioeconomic inequalities in self-rated health, smoking, and physical activity of Japanese adults from 2000 to 2010. *SSM Popul Health* 2016;2:662-73. doi: 10.1016/j.ssmph.2016.09.002 [published Online First: 2016/09/09]
20. Gheorghe M, Wubulihasimu P, Peters F, et al. Health inequalities in the Netherlands: trends in quality-adjusted life expectancy (QALE) by educational level. *Eur J Public Health* 2016;26(5):794-99. doi: 10.1093/eurpub/ckw043 [published Online First: 2016/04/17]
21. Ferraro KF, Shippee TP. Aging and cumulative inequality: how does inequality get under the skin? *Gerontologist* 2009;49(3):333-43. doi: 10.1093/geront/gnp034 [published Online First: 2009/04/21]
22. Pampel FC, Hardy M. Status Maintenance and Change during Old Age\*. *Social Forces* 1994;73(1):289-314. doi: 10.1093/sf/73.1.289
23. George LK. The Life Course Perspective. In: Gu D, Dupre ME, eds. *Encyclopedia of Gerontology and Population Aging*. Cham: Springer International Publishing 2019:1-9.
24. Andrea E. Willson, Kim M. Shuey, Glen H. Elder J. Cumulative Advantage Processes as Mechanisms of Inequality in Life Course Health. *American Journal of Sociology* 2007;112(6):1886-924. doi: 10.1086/512712
25. Leopold L, Engelhardt H. Education and physical health trajectories in old age. Evidence from the Survey of Health, Ageing and Retirement in Europe (SHARE). *International Journal of Public Health* 2013;58(1):23-31. doi: 10.1007/s00038-012-0399-0
26. Schöllgen I, Huxhold O, Tesch-Römer C. Socioeconomic status and health in the second half of life: findings from the German Ageing Survey. *European Journal of Ageing* 2010;7(1):17-28. doi: 10.1007/s10433-010-0140-x
27. Herd P. Do Functional Health Inequalities Decrease in Old Age?: Educational Status and Functional Decline Among the 1931-1941 Birth Cohort. *Research on Aging* 2006;28(3):375-92. doi: 10.1177/0164027505285845
28. Pavalko EK, Caputo J. Social Inequality and Health Across the Life Course. *American Behavioral Scientist* 2013;57(8):1040-56. doi: 10.1177/0002764213487344
29. Larson K, Russ SA, Kahn RS, et al. Health Disparities: A Life Course Health Development Perspective and Future Research Directions. In: Halfon N, Forrest CB, Lerner RM, et al., eds. *Handbook of Life Course Health Development*. Cham: Springer International Publishing 2018:499-520.
30. San Sebastian M, Hammarström A, Gustafsson PE. Socioeconomic inequalities in functional somatic symptoms by social and material conditions at four life course periods in Sweden: a decomposition analysis. *BMJ Open* 2015;5(8):e006581. doi: 10.1136/bmjopen-2014-006581



- 1  
2  
3 31. Johansson SE, Midlöv P, Sundquist J, et al. Longitudinal trends in good self-rated health:  
4 effects of age and birth cohort in a 25-year follow-up study in Sweden. *Int J Public*  
5 *Health* 2015;60(3):363-73. doi: 10.1007/s00038-015-0658-y [published Online First:  
6 2015/02/05]
- 7  
8 32. Clause-Verdureau AC, Audureau É, Leplège A, et al. Contrasted trends in health-related  
9 quality of life across gender, age categories and work status in France, 1995-2016:  
10 repeated population-based cross-sectional surveys using the SF-36. *J Epidemiol*  
11 *Community Health* 2019;73(1):65-72. doi: 10.1136/jech-2018-210941 [published  
12 Online First: 2018/10/12]
- 13  
14 33. Wolff JK, Nowossadeck S, Spuling SM. Altern nachfolgende Kohorten gesünder?  
15 Selbstberichtete Erkrankungen und funktionale Gesundheit im Kohortenvergleich. In:  
16 Mahne K, Wolff JK, Simonson J, et al., eds. Altern im Wandel: Zwei Jahrzehnte  
17 Deutscher Alterssurvey (DEAS). Wiesbaden: Springer Fachmedien Wiesbaden  
18 2017:125-38.
- 19  
20 34. Sperlich S, Tetzlaff J, Geyer S. Trends in good self-rated health in Germany between 1995  
21 and 2014: do age and gender matter? *Int J Public Health* 2019;64(6):921-33. doi:  
22 10.1007/s00038-019-01235-y [published Online First: 2019/03/29]
- 23  
24 35. Beller J, Miething A, Regidor E, et al. Trends in grip strength: Age, period, and cohort  
25 effects on grip strength in older adults from Germany, Sweden, and Spain. *SSM -*  
26 *Population Health* 2019;9:100456. doi: <https://doi.org/10.1016/j.ssmph.2019.100456>
- 27  
28 36. Duijster D, Oude Groeniger J, van der Heijden GJMG, et al. Material, behavioural,  
29 cultural and psychosocial factors in the explanation of socioeconomic inequalities in  
30 oral health. *European Journal of Public Health* 2017;28(4):590-97. doi:  
31 10.1093/eurpub/ckx209
- 32  
33 37. Khang Y-H, Lynch JW, Yang S, et al. The contribution of material, psychosocial, and  
34 behavioral factors in explaining educational and occupational mortality inequalities in  
35 a nationally representative sample of South Koreans: Relative and absolute  
36 perspectives. *Social Science & Medicine* 2009;68(5):858-66. doi:  
37 <https://doi.org/10.1016/j.socscimed.2008.12.003>
- 38  
39 38. van Oort FVA, van Lenthe FJ, Mackenbach JP. Material, psychosocial, and behavioural  
40 factors in the explanation of educational inequalities in mortality in the Netherlands.  
41 *Journal of Epidemiology and Community Health* 2005;59(3):214-20. doi:  
42 10.1136/jech.2003.016493
- 43  
44 39. Moor I, Spallek J, Richter M. Explaining socioeconomic inequalities in self-rated health: a  
45 systematic review of the relative contribution of material, psychosocial and  
46 behavioural factors. *J Epidemiol Community Health* 2017;71(6):565-75. doi:  
47 10.1136/jech-2016-207589 [published Online First: 2016/09/30]
- 48  
49 40. von Elm E, Altman DG, Egger M, et al. The Strengthening the Reporting of Observational  
50 Studies in Epidemiology (STROBE) statement: guidelines for reporting observational  
51 studies. *J Clin Epidemiol* 2008;61(4):344-9. doi: 10.1016/j.jclinepi.2007.11.008  
52 [published Online First: 2008/03/04]
- 53  
54 41. Frick J, Schupp J, Wagner G. The German Socio-Economic Panel Study (SOEP)—Scope,  
55 evolution and enhancements. *Schmollers Jahrbuch : Journal of Applied Social Science*  
56 *Studies / Zeitschrift für Wirtschafts- und Sozialwissenschaften* 2007;127:139-69. doi:  
57 10.2139/ssrn.1028709
- 58  
59 42. Goebel J, Grabka MM, Liebig S, et al. The German Socio-Economic Panel (SOEP).  
60 2019;239(2):345. doi: <https://doi.org/10.1515/jbnst-2018-0022>
43. DeSalvo KB, Fan VS, McDonnell MB, et al. Predicting mortality and healthcare utilization  
with a single question. *Health Serv Res* 2005;40(4):1234-46. doi: 10.1111/j.1475-  
6773.2005.00404.x [published Online First: 2005/07/22]



- 1  
2  
3 44. Idler EL, Russell LB, Davis D. Survival, Functional Limitations, and Self-rated Health in  
4 the NHANES I Epidemiologic Follow-up Study, 1992. *American Journal of*  
5 *Epidemiology* 2000;152(9):874-83. doi: 10.1093/aje/152.9.874  
6  
7 45. Jylhä M. What is self-rated health and why does it predict mortality? Towards a unified  
8 conceptual model. *Soc Sci Med* 2009;69(3):307-16. doi:  
9 10.1016/j.socscimed.2009.05.013 [published Online First: 2009/06/13]  
10  
11 46. Bullinger M, Quitmann J. Quality of life as patient-reported outcomes: principles of  
12 assessment. *Dialogues Clin Neurosci* 2014;16(2):137-45. [published Online First:  
13 2014/08/26]  
14  
15 47. Nübling M, Andersen H, Mühlbacher A, et al. Computation of Standard Values for  
16 Physical and Mental Health Scale Scores Using the SOEP Version of SF12v2.  
17 *Schmollers Jahrbuch : Journal of Applied Social Science Studies / Zeitschrift für*  
18 *Wirtschafts- und Sozialwissenschaften* 2007;127(1):171-82.  
19  
20 48. Liang K-Y, Zeger SL. Longitudinal data analysis using generalized linear models.  
21 *Biometrika* 1986;73(1):13-22. doi: 10.1093/biomet/73.1.13  
22  
23 49. Hu FB, Goldberg J, Hedeker D, et al. Comparison of Population-Averaged and Subject-  
24 Specific Approaches for Analyzing Repeated Binary Outcomes. *American Journal of*  
25 *Epidemiology* 1998;147(7):694-703. doi: 10.1093/oxfordjournals.aje.a009511  
26  
27 50. Mackenbach JP, Kunst AE. Measuring the magnitude of socio-economic inequalities in  
28 health: an overview of available measures illustrated with two examples from Europe.  
29 *Soc Sci Med* 1997;44(6):757-71. doi: 10.1016/s0277-9536(96)00073-1 [published  
30 Online First: 1997/03/01]  
31  
32 51. Bardel A, Wallander MA, Wallman T, et al. Age and sex related self-reported symptoms  
33 in a general population across 30 years: Patterns of reporting and secular trend. *PLoS*  
34 *One* 2019;14(2):e0211532. doi: 10.1371/journal.pone.0211532 [published Online  
35 First: 2019/02/05]  
36  
37 52. Asada Y, Hurley J, Grignon M, et al. Health inequalities and inequities by age: Stability  
38 for the Health Utilities Index and divergence for the Frailty Index. *SSM - Population*  
39 *Health* 2018;5:17-32. doi: <https://doi.org/10.1016/j.ssmph.2018.04.002>  
40  
41 53. Granström F, Molarius A, Garvin P, et al. Exploring trends in and determinants of  
42 educational inequalities in self-rated health. *Scand J Public Health* 2015;43(7):677-86.  
43 doi: 10.1177/1403494815592271 [published Online First: 2015/07/04]  
44  
45 54. Aguilar-Palacio I, Carrera-Lasfuentes P, Sánchez-Recio R, et al. Recession, employment  
46 and self-rated health: a study on the gender gap. *Public Health* 2018;154:44-50. doi:  
47 10.1016/j.puhe.2017.10.013 [published Online First: 2017/12/05]  
48  
49 55. Karasek R, Baker D, Marxer F, et al. Job decision latitude, job demands, and  
50 cardiovascular disease: a prospective study of Swedish men. *Am J Public Health*  
51 1981;71(7):694-705. doi: 10.2105/ajph.71.7.694 [published Online First: 1981/07/01]  
52  
53 56. Caman OK, Calling S, Midlöv P, et al. Longitudinal age-and cohort trends in body mass  
54 index in Sweden--a 24-year follow-up study. *BMC Public Health* 2013;13:893-93.  
55 doi: 10.1186/1471-2458-13-893  
56  
57 57. Reither EN, Hauser RM, Yang Y. Do birth cohorts matter? Age-period-cohort analyses of  
58 the obesity epidemic in the United States. *Social science & medicine (1982)*  
59 2009;69(10):1439-48. doi: 10.1016/j.socscimed.2009.08.040 [published Online First:  
60 2009/09/19]  
61  
62 58. Diouf I, Charles MA, Ducimetière P, et al. Evolution of obesity prevalence in France: an  
63 age-period-cohort analysis. *Epidemiology* 2010;21(3):360-65. doi:  
64 10.1097/EDE.0b013e3181d5b5ff5  
65  
66 59. Statistisches Jahrbuch 2019. Deutschland und Internationales [www.destatis.de/jahrbuch](http://www.destatis.de/jahrbuch):  
67 Statistisches Bundesamt (Destatis); 2019 [accessed 15. May 2019 2019].

- 1  
2  
3 60. Blanchard RD, Bunker JB, Wachs M. Distinguishing aging, period and cohort effects in  
4 longitudinal studies of elderly populations. *Socio-Economic Planning Sciences*  
5 1977;11(3):137-46. doi: [https://doi.org/10.1016/0038-0121\(77\)90032-5](https://doi.org/10.1016/0038-0121(77)90032-5)  
6  
7  
8  
9  
10  
11  
12  
13  
14  
15  
16  
17  
18  
19  
20  
21  
22  
23  
24  
25  
26  
27  
28  
29  
30  
31  
32  
33  
34  
35  
36  
37  
38  
39  
40  
41  
42  
43  
44  
45  
46  
47  
48  
49  
50  
51  
52  
53  
54  
55  
56  
57  
58  
59  
60

For peer review only

**Table 1:** Weighted sample characteristics in % by time period, GSOEP 2002-2016,  $n_{\text{observations}}=170,317$ .

|                            | <b>2002-2006<br/>(n=54,244)</b> | <b>2007-2011<br/>(n=56,299)</b> | <b>2012-2016<br/>(n=59,774)</b> |
|----------------------------|---------------------------------|---------------------------------|---------------------------------|
| <b>Sex</b>                 | %                               | %                               | %                               |
| Women                      | 54.2                            | 53.7                            | 53.2                            |
| Men                        | 45.8                            | 46.3                            | 46.8                            |
| Missings (n)               | 0                               | 0                               | 0                               |
| <b>Age groups in years</b> |                                 |                                 |                                 |
| 50-64                      | 49.2                            | 48.2                            | 50.0                            |
| 65-79                      | 40.2                            | 40.0                            | 38.7                            |
| 80+                        | 10.6                            | 11.8                            | 11.3                            |
| missing (n)                | 0                               | 0                               | 0                               |
| <b>School education</b>    |                                 |                                 |                                 |
| primary / no education     | 58.5                            | 51.3                            | 43.9                            |
| secondary                  | 19.5                            | 23.4                            | 26.2                            |
| tertiary                   | 14.6                            | 17.0                            | 19.6                            |
| other qualification        | 7.4                             | 8.3                             | 10.3                            |
| missing (n)                | 1689                            | 1262                            | 1212                            |
| <b>Income</b>              |                                 |                                 |                                 |
| <60%                       | 14.5                            | 15.8                            | 15.3                            |
| 60% - < 150%               | 67.5                            | 65.9                            | 65.6                            |
| ≥ 150 %                    | 18.0                            | 18.3                            | 19.1                            |
| missing (n)                | 16                              | 13                              | 31                              |
| <b>Living with partner</b> |                                 |                                 |                                 |
| yes                        | 67.8                            | 66.7                            | 66.6                            |
| no                         | 32.2                            | 33.3                            | 33.4                            |
| missing (n)                | 0                               | 0                               | 1                               |
| <b>Nationality</b>         |                                 |                                 |                                 |
| German                     | 93.6                            | 92.8                            | 92.8                            |
| others                     | 6.4                             | 7.2                             | 7.2                             |
| missing (n)                | 0                               | 0                               | 1                               |

GSOEP: German Socio-Economic Panel; n= number of observations (maximum sample size of annually surveys 2002 to 2016), income: equivalized net income.

**Table 2:** Educational inequalities in HRQOL (MCS / PCS) and poor SRH in men and women, stratified by life stage, GSOEP 2002-2016

|                                       |           | Men   |                          |               |                 |               |                |       |             |
|---------------------------------------|-----------|-------|--------------------------|---------------|-----------------|---------------|----------------|-------|-------------|
|                                       |           | MCS   |                          |               | PCS             |               | Poor SRH       |       |             |
| Life stage                            | Education | n     | Coef.                    | 95% CI        | Coef.           | 95% CI        | OR             | n     | 95% CI      |
| <b>all ages</b>                       | low       | 13902 | <b>-0.85***</b>          | -1.31 - -0.40 | <b>-4.07***</b> | -4.53 - -3.61 | <b>1.66***</b> | 30102 | 1.50 - 1.84 |
|                                       | medium    | 6857  | <b>-0.48<sup>◇</sup></b> | -0.98 - 0.02  | <b>-2.40***</b> | -2.88 - -1.92 | <b>1.21**</b>  | 14604 | 1.08 - 1.37 |
|                                       | high      | 8578  | 1                        |               | 1               |               | 1              | 17640 |             |
| <b>Later working life (50-64 yr.)</b> | low       | 6050  | -0.40                    | -0.99 - 0.19  | <b>-4.59***</b> | -5.17 - -4.00 | <b>1.90***</b> | 13042 | 1.65 - 2.17 |
|                                       | medium    | 4501  | -0.42                    | -1.01 - 0.18  | <b>-2.70***</b> | -3.26 - -2.15 | <b>1.28**</b>  | 9590  | 1.11 - 1.48 |
|                                       | high      | 5008  | 1                        |               | 1               |               | 1              | 10411 |             |
| <b>Young seniors (65-79 yr.)</b>      | low       | 6727  | <b>-1.23***</b>          | -1.89 - -0.57 | <b>-3.49***</b> | -4.19 - -2.79 | <b>1.51***</b> | 14484 | 1.30 - 1.75 |
|                                       | medium    | 2031  | -0.25                    | -1.05-0.55    | <b>-1.89***</b> | -2.76 - -1.03 | 1.15           | 4278  | 0.96 - 1.39 |
|                                       | high      | 3140  | 1                        |               | 1               |               | 1              | 6244  |             |
| <b>Old age (80+ yr.)</b>              | low       | 1125  | <b>-2.25*</b>            | -4.14 - -0.36 | <b>-2.29**</b>  | -4.01 - -0.57 | <b>1.42*</b>   | 2576  | 1.05 - 1.11 |
|                                       | medium    | 325   | -1.42                    | -3.40 - 0.55  | -1.31           | -3.42 - 0.79  | 1.20           | 736   | 0.83 - 1.74 |
|                                       | high      | 430   | 1                        |               | 1               |               | 1              | 985   |             |
|                                       |           | Women |                          |               |                 |               |                |       |             |
|                                       |           | MCS   |                          |               | PCS             |               | Poor SRH       |       |             |
| Life stage                            | Education | n     | Coef.                    | 95% CI        | Coef.           | 95% CI        | OR             | n     | 95% CI      |
| <b>all ages</b>                       | low       | 16251 | <b>-1.10***</b>          | -1.64 - -0.57 | <b>-3.31***</b> | -3.84 - -2.77 | <b>1.56***</b> | 35521 | 1.40-1.75   |
|                                       | medium    | 9544  | -0.21                    | -0.74 - 0.33  | <b>-1.76***</b> | -2.29 - -1.22 | <b>1.19**</b>  | 20149 | 1.06-1.34   |
|                                       | high      | 5970  | 1                        |               | 1               |               | 1              | 12599 |             |
| <b>Later working life (50-64 yr.)</b> | low       | 6347  | -0.50                    | -1.16 - 0.17  | <b>-3.67***</b> | -4.32 - -3.02 | <b>1.54***</b> | 13665 | 1.34 - 1.76 |
|                                       | medium    | 6494  | 0.50                     | -0.57 - 0.67  | <b>-1.91***</b> | -2.52 - -1.32 | 1.10           | 13609 | 0.96 - 1.26 |
|                                       | high      | 4103  | 1                        |               | 1               |               | 1              | 8561  |             |
| <b>Young seniors (65-79 yr.)</b>      | low       | 7880  | <b>-2.64***</b>          | -3.47 - -1.80 | <b>-3.16***</b> | -4.08 - -2.24 | <b>1.77***</b> | 17176 | 1.48 - 2.12 |
|                                       | medium    | 2590  | <b>-1.04*</b>            | -1.97 - -0.12 | <b>-1.81**</b>  | -2.83 - -0.78 | <b>1.39**</b>  | 5519  | 1.14 - 1.70 |
|                                       | high      | 1615  | 1                        |               | 1               |               | 1              | 3422  |             |
| <b>Old age (80+ yr.)</b>              | low       | 2024  | <b>-3.87***</b>          | -5.99 - -1.74 | -1.02           | -3.00 - 0.96  | <b>1.43*</b>   | 4680  | 1.04 - 1.08 |
|                                       | medium    | 460   | -1.65                    | -4.08 - -0.77 | 1.54            | -0.74 - 3.82  | 1.08           | 1021  | 0.76 - 6.21 |
|                                       | high      | 252   | 1                        |               | 1               |               | 1              | 616   |             |

Adjusted for age, nationality, living with partner and equivalized net income; GSOEP: German Socio-Economic Panel; MCS: Mental Component Summary; PCS: Physical Component Summary; SRH: Self-Rated Health; Coef.: Coefficient; CI: Confidence Interval; <sup>◇</sup> p<0.10, \*p<0.05, \*\*p<0.01, \*\*\*p<0.001.

**Table 3:** Time trends in HRQOL (MCS / PCS) and poor SRH in men and women, stratified by life stage and level of education, GSOEP 2002-2016

| Time trend                              | Men   |                |               |                         |               |          |                         |             |
|-----------------------------------------|-------|----------------|---------------|-------------------------|---------------|----------|-------------------------|-------------|
|                                         | MCS   |                |               | PCS                     |               | Poor SRH |                         |             |
|                                         | n     | Coeff.         | 95% CI        | Coeff.                  | 95% CI        | n        | OR                      | 95% CI      |
| <b>Later working life (50 - 64 yr.)</b> |       |                |               |                         |               |          |                         |             |
| Education low                           | 6050  | 0.79           | - 0.16 - 1.74 | - 0.68                  | - 1.63 - 0.27 | 13042    | 1.06                    | 0.89 - 1.26 |
| medium                                  | 4501  | 0.21           | - 0.90 - 1.33 | - 0.75                  | - 1.79 - 0.30 | 9590     | 1.12                    | 0.89 - 1.44 |
| high                                    | 5008  | <b>1.01*</b>   | 0.04 - 1.98   | - 0.32                  | - 1.20 - 0.56 | 10411    | 1.00                    | 0.77 - 1.30 |
| <b>Young seniors (65 - 79 yr.)</b>      |       |                |               |                         |               |          |                         |             |
| Education low                           | 6727  | <b>1.82***</b> | 0.80 - 2.85   | <b>1.56**</b>           | 0.56 - 2.56   | 14484    | <b>0.69***</b>          | 0.57 - 0.83 |
| medium                                  | 2031  | <b>1.85*</b>   | 0.19 - 3.50   | 0.33                    | - 1.33 - 2.00 | 4278     | 1.16                    | 0.77 - 1.62 |
| high                                    | 3140  | 0.47           | - 0.89 - 1.83 | 0.53                    | - 0.87 - 1.93 | 6244     | <b>0.74<sup>◇</sup></b> | 0.53 - 1.08 |
| <b>Old age (80+ yr.)</b>                |       |                |               |                         |               |          |                         |             |
| Education low                           | 1125  | 0.63           | - 2.31 - 3.57 | 0.05                    | - 2.42 - 2.53 | 2576     | 0.91                    | 0.61 - 1.35 |
| medium                                  | 325   | -2.63          | - 7.05 - 1.80 | 2.07                    | - 2.97 - 7.10 | 736      | 1.22                    | 0.56 - 2.65 |
| high                                    | 430   | 2.59           | - 1.57 - 6.75 | 0.89                    | - 2.79 - 4.57 | 985      | 0.56                    | 0.26 - 1.21 |
|                                         | Women |                |               |                         |               |          |                         |             |
| Time trend                              | MCS   |                |               | PCS                     |               | Poor SRH |                         |             |
|                                         | n     | Coeff.         | 95% CI        | Coeff.                  | 95% CI        | n        | OR                      | 95% CI      |
| <b>Later working life (50 - 64 yr.)</b> |       |                |               |                         |               |          |                         |             |
| Education low                           | 6347  | 0.90           | - 0.10 - 1.89 | <b>-1.65**</b>          | - 2.65 - 0.66 | 13665    | <b>1.33*</b>            | 1.12 - 1.59 |
| medium                                  | 6494  | 0.36           | - 0.60 - 1.32 | - 0.34                  | - 1.25 - 0.57 | 13609    | 1.04                    | 0.84 - 1.28 |
| high                                    | 4103  | 0.78           | - 0.39 - 1.95 | 0.36                    | - 0.78 - 1.49 | 8561     | 0.97                    | 0.75 - 1.27 |
| <b>Young seniors (65 - 79 yr.)</b>      |       |                |               |                         |               |          |                         |             |
| Education low                           | 7880  | <b>2.75***</b> | 1.74 - 3.76   | <b>1.30**</b>           | 0.39 - 2.21   | 17176    | <b>0.73***</b>          | 0.62 - 0.89 |
| medium                                  | 2590  | 0.78           | - 0.78 - 2.34 | - 0.13                  | - 1.83 - 1.57 | 5519     | 0.83                    | 0.61 - 1.13 |
| high                                    | 1615  | 1.44           | - 0.58 - 3.45 | <b>1.97<sup>◇</sup></b> | - 0.01 - 3.94 | 3422     | <b>0.67<sup>◇</sup></b> | 0.43 - 1.03 |
| <b>Old age (80+ yr.)</b>                |       |                |               |                         |               |          |                         |             |
| Education low                           | 2024  | 0.77           | - 1.33 - 2.87 | 0.61                    | - 1.01 - 2.22 | 4680     | 0.70                    | 0.53 - 0.94 |
| medium                                  | 460   | 0.04           | - 4.62 - 4.71 | <b>3.35<sup>◇</sup></b> | - 0.04 - 6.74 | 1021     | 0.75                    | 0.41 - 1.36 |
| high                                    | 252   | 1.57           | - 2.80 - 5.95 | 1.59                    | - 3.97 - 7.15 | 616      | 0.88                    | 0.41 - 1.90 |

Adjusted for age, nationality, living with partner and equivalized net income; MCS: Mental Component Summary; PCS: Physical Component Summary; SRH: Self-Rated Health; n: number of observations; GSOEP: German Socio-Economic Panel; <sup>◇</sup> p<0.10, \*p<0.05, \*\*p<0.01, \*\*\*p<0.001

**Table 4:** Trends in relative (RII) and absolute (SII) educational inequalities in HRQOL (MCS / PCS) and poor SRH, stratified by gender and life stage, GSEOP 2002-2016

|                                         |          | n     | RII                     | 95% CI    | SII                     | 95% CI       |
|-----------------------------------------|----------|-------|-------------------------|-----------|-------------------------|--------------|
| <b>Men</b>                              |          |       |                         |           |                         |              |
| <b>all ages</b>                         | MCS      | 35208 | 1.01                    | 0.98-1.04 | 0.52                    | -0.84-1.87   |
|                                         | PCS      | 35208 | 1.02                    | 0.99-1.05 | 0.91                    | -0.38-2.20   |
|                                         | Poor SRH | 69095 | 0.88                    | 0.69-1.12 | -0.03                   | -0.08-0.03   |
| <b>Later working life (50 - 64 yr.)</b> | MCS      | 18947 | 1.00                    | 0.96-1.03 | -0.20                   | -2.04-1.64   |
|                                         | PCS      | 18947 | 0.99                    | 0.95-1.03 | -0.56                   | -2.39-1.23   |
|                                         | Poor SRH | 37316 | 1.16                    | 0.80-1.67 | 0.03                    | -0.04-0.10   |
| <b>Young Seniors (65-79 yr.)</b>        | MCS      | 13840 | <b>1.05*</b>            | 1.01-1.10 | <b>2.76*</b>            | 0.41-5.11    |
|                                         | PCS      | 13840 | <b>1.05<sup>◇</sup></b> | 1.00-1.11 | <b>2.12<sup>◇</sup></b> | -0.27-4.51   |
|                                         | Poor SRH | 27028 | 0.73                    | 0.48-1.13 | <b>-0.10*</b>           | -0.19-0.01   |
| <b>Old age (80+yr.)</b>                 | MCS      | 2421  | 1.03                    | 0.91-1.17 | 1.44                    | -5.20-5.09   |
|                                         | PCS      | 2421  | 0.89                    | 0.77-1.04 | -4.71                   | -10.58-1.16  |
|                                         | Poor SRH | 4751  | 1.08                    | 0.52-2.26 | 0.06                    | -0.23-0.34   |
| <b>Women</b>                            |          |       |                         |           |                         |              |
|                                         |          | n     | RII                     | 95% CI    | SII                     | 95% CI       |
| <b>all ages</b>                         | MCS      | 38229 | <b>1.03*</b>            | 1.00-1.06 | <b>1.41<sup>◇</sup></b> | -0.03-2.86   |
|                                         | PCS      | 38229 | 0.98                    | 0.95-1.01 | -0.59                   | -1.95-0.76   |
|                                         | Poor SRH | 75142 | 0.99                    | 0.80-1.23 | 0.01                    | -0.04-0.06   |
| <b>Later working life (50 - 64 yr.)</b> | MCS      | 20412 | 1.00                    | 0.97-1.04 | 0.27                    | -1.61-2.15   |
|                                         | PCS      | 20412 | <b>0.94**</b>           | 0.90-0.98 | <b>-2.98**</b>          | -4.86- -1.11 |
|                                         | Poor SRH | 40074 | 1.29                    | 0.94-1.78 | <b>0.07*</b>            | 0.00-0.14    |
| <b>Young Seniors (65-79 yr.)</b>        | MCS      | 14371 | <b>1.06*</b>            | 1.01-1.12 | <b>2.82*</b>            | 0.16-5.50    |
|                                         | PCS      | 14371 | 1.02                    | 0.96-1.09 | 0.85                    | -1.82-3.52   |
|                                         | Poor SRH | 28179 | 1.10                    | 0.74-1.63 | -0.04                   | -0.14-0.07   |
| <b>Old age (80+yr.)</b>                 | MCS      | 3446  | 1.03                    | 0.91-1.17 | 1.19                    | -5.25-7.63   |
|                                         | PCS      | 3446  | 0.97                    | 0.84-1.13 | -0.96                   | -6.63-4.72   |
|                                         | Poor SRH | 6889  | 1.02                    | 0.57-1.22 | -0.02                   | -0.28-0.23   |

Adjusted for age, nationality, living with partner and equivalised net income; MCS: Mental Component Summary; PCS: Physical Component Summary, SRH: Self-Rated Health; n: number of observations; GSEOP: German Socio-Economic Panel; RII: Relative Index of Inequality, SII: Slope Index of inequality; <sup>◇</sup> p<0.10, \*p<0.05, \*\*p<0.01, \*\*\*p<0.001

Figure captions

Figure 1: Trends in HRQOL (MCS / PCS) and poor SRH (predicted means and probabilities) by life stages among men.

Figure 2: Trends in HRQOL (MCS / PCS) and poor SRH (predicted means and probabilities) by life stages among women.

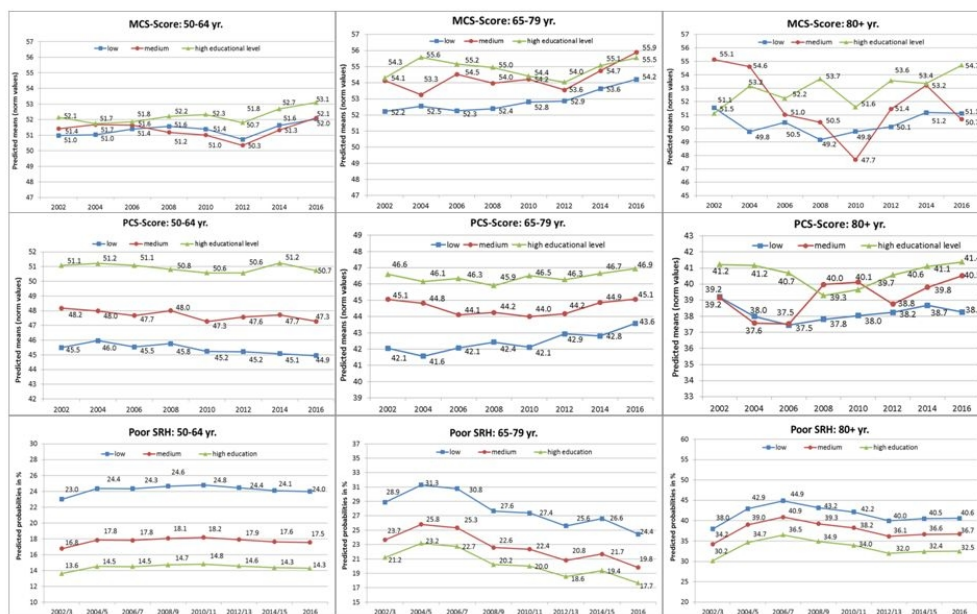

Figure 1: Trends in HRQOL (MCS / PCS) and poor SRH (predicted means and probabilities) by life stages among men.

81x60mm (300 x 300 DPI)



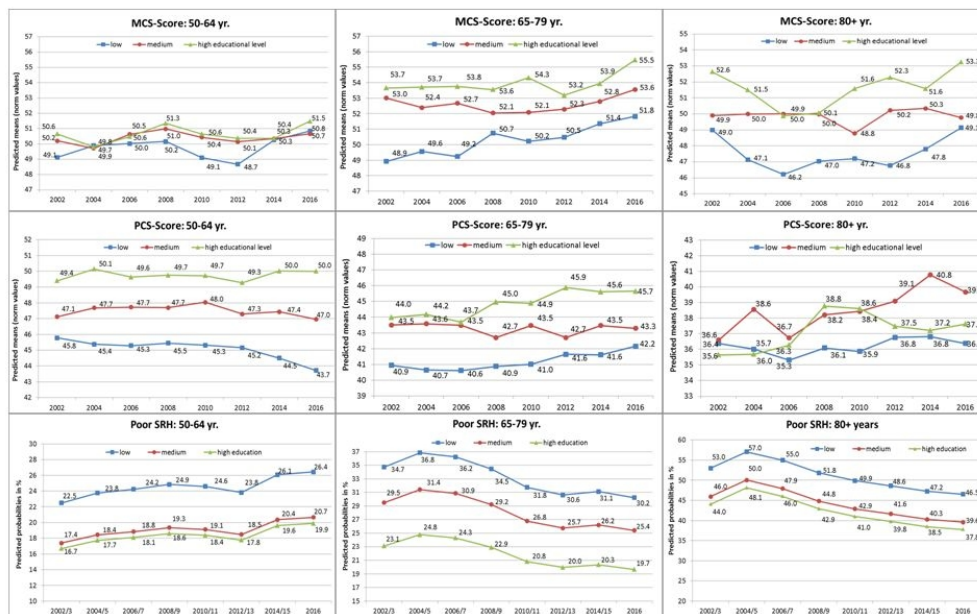

Figure 2: Trends in HRQOL (MCS / PCS) and poor SRH (predicted means and probabilities) by life stages among women.

81x60mm (300 x 300 DPI)

# Reporting checklist for cross sectional study.

Based on the STROBE cross sectional guidelines.

## Instructions to authors

Complete this checklist by entering the page numbers from your manuscript where readers will find each of the items listed below.

Your article may not currently address all the items on the checklist. Please modify your text to include the missing information. If you are certain that an item does not apply, please write "n/a" and provide a short explanation.

Upload your completed checklist as an extra file when you submit to a journal.

In your methods section, say that you used the STROBE cross sectional reporting guidelines, and cite them as:

von Elm E, Altman DG, Egger M, Pocock SJ, Gøtzsche PC, Vandenbroucke JP. The Strengthening the Reporting of Observational Studies in Epidemiology (STROBE) Statement: guidelines for reporting observational studies.

|                           | Reporting Item                                                                                                      | Page Number |
|---------------------------|---------------------------------------------------------------------------------------------------------------------|-------------|
| <b>Title and abstract</b> |                                                                                                                     |             |
| Title                     | <a href="#">#1a</a> Indicate the study's design with a commonly used term in the title or the abstract              | 1           |
| Abstract                  | <a href="#">#1b</a> Provide in the abstract an informative and balanced summary of what was done and what was found | 2           |
| <b>Introduction</b>       |                                                                                                                     |             |
| Background / rationale    | <a href="#">#2</a> Explain the scientific background and rationale for the investigation being reported             | 4           |
| Objectives                | <a href="#">#3</a> State specific objectives, including any prespecified hypotheses                                 | 5           |
| <b>Methods</b>            |                                                                                                                     |             |

|    |                            |                      |                                                                                                                                                                                                                                                                      |     |
|----|----------------------------|----------------------|----------------------------------------------------------------------------------------------------------------------------------------------------------------------------------------------------------------------------------------------------------------------|-----|
| 1  | Study design               | <a href="#">#4</a>   | Present key elements of study design early in the paper                                                                                                                                                                                                              | 5   |
| 2  |                            |                      |                                                                                                                                                                                                                                                                      |     |
| 3  |                            |                      |                                                                                                                                                                                                                                                                      |     |
| 4  | Setting                    | <a href="#">#5</a>   | Describe the setting, locations, and relevant dates, including periods of recruitment, exposure, follow-up, and data collection                                                                                                                                      | 5-6 |
| 5  |                            |                      |                                                                                                                                                                                                                                                                      |     |
| 6  |                            |                      |                                                                                                                                                                                                                                                                      |     |
| 7  |                            |                      |                                                                                                                                                                                                                                                                      |     |
| 8  |                            |                      |                                                                                                                                                                                                                                                                      |     |
| 9  |                            |                      |                                                                                                                                                                                                                                                                      |     |
| 10 | Eligibility criteria       | <a href="#">#6a</a>  | Give the eligibility criteria, and the sources and methods of selection of participants.                                                                                                                                                                             | 5   |
| 11 |                            |                      |                                                                                                                                                                                                                                                                      |     |
| 12 |                            |                      |                                                                                                                                                                                                                                                                      |     |
| 13 |                            |                      |                                                                                                                                                                                                                                                                      |     |
| 14 |                            | <a href="#">#7</a>   | Clearly define all outcomes, exposures, predictors, potential confounders, and effect modifiers. Give diagnostic criteria, if applicable                                                                                                                             | 6-7 |
| 15 |                            |                      |                                                                                                                                                                                                                                                                      |     |
| 16 |                            |                      |                                                                                                                                                                                                                                                                      |     |
| 17 |                            |                      |                                                                                                                                                                                                                                                                      |     |
| 18 |                            |                      |                                                                                                                                                                                                                                                                      |     |
| 19 | Data sources / measurement | <a href="#">#8</a>   | For each variable of interest give sources of data and details of methods of assessment (measurement). Describe comparability of assessment methods if there is more than one group. Give information separately for for exposed and unexposed groups if applicable. | 6-7 |
| 20 |                            |                      |                                                                                                                                                                                                                                                                      |     |
| 21 |                            |                      |                                                                                                                                                                                                                                                                      |     |
| 22 |                            |                      |                                                                                                                                                                                                                                                                      |     |
| 23 |                            |                      |                                                                                                                                                                                                                                                                      |     |
| 24 |                            |                      |                                                                                                                                                                                                                                                                      |     |
| 25 |                            |                      |                                                                                                                                                                                                                                                                      |     |
| 26 |                            |                      |                                                                                                                                                                                                                                                                      |     |
| 27 |                            |                      |                                                                                                                                                                                                                                                                      |     |
| 28 |                            |                      |                                                                                                                                                                                                                                                                      |     |
| 29 | Bias                       | <a href="#">#9</a>   | Describe any efforts to address potential sources of bias                                                                                                                                                                                                            | 7   |
| 30 |                            |                      |                                                                                                                                                                                                                                                                      |     |
| 31 |                            |                      |                                                                                                                                                                                                                                                                      |     |
| 32 |                            |                      |                                                                                                                                                                                                                                                                      |     |
| 33 | Study size                 | <a href="#">#10</a>  | Explain how the study size was arrived at                                                                                                                                                                                                                            | 5   |
| 34 |                            |                      |                                                                                                                                                                                                                                                                      |     |
| 35 | Quantitative variables     | <a href="#">#11</a>  | Explain how quantitative variables were handled in the analyses. If applicable, describe which groupings were chosen, and why                                                                                                                                        | 7-8 |
| 36 |                            |                      |                                                                                                                                                                                                                                                                      |     |
| 37 |                            |                      |                                                                                                                                                                                                                                                                      |     |
| 38 |                            |                      |                                                                                                                                                                                                                                                                      |     |
| 39 |                            |                      |                                                                                                                                                                                                                                                                      |     |
| 40 | Statistical methods        | <a href="#">#12a</a> | Describe all statistical methods, including those used to control for confounding                                                                                                                                                                                    | 7-8 |
| 41 |                            |                      |                                                                                                                                                                                                                                                                      |     |
| 42 |                            |                      |                                                                                                                                                                                                                                                                      |     |
| 43 |                            |                      |                                                                                                                                                                                                                                                                      |     |
| 44 | Statistical methods        | <a href="#">#12b</a> | Describe any methods used to examine subgroups and interactions                                                                                                                                                                                                      | 7-8 |
| 45 |                            |                      |                                                                                                                                                                                                                                                                      |     |
| 46 |                            |                      |                                                                                                                                                                                                                                                                      |     |
| 47 |                            |                      |                                                                                                                                                                                                                                                                      |     |
| 48 | Statistical methods        | <a href="#">#12c</a> | Explain how missing data were addressed                                                                                                                                                                                                                              | 6   |
| 49 |                            |                      |                                                                                                                                                                                                                                                                      |     |
| 50 |                            |                      |                                                                                                                                                                                                                                                                      |     |
| 51 |                            |                      |                                                                                                                                                                                                                                                                      |     |
| 52 | Statistical methods        | <a href="#">#12d</a> | If applicable, describe analytical methods taking account of sampling strategy                                                                                                                                                                                       | 6-7 |
| 53 |                            |                      |                                                                                                                                                                                                                                                                      |     |
| 54 |                            |                      |                                                                                                                                                                                                                                                                      |     |
| 55 |                            |                      |                                                                                                                                                                                                                                                                      |     |
| 56 | Statistical methods        | <a href="#">#12e</a> | Describe any sensitivity analyses                                                                                                                                                                                                                                    | 14  |
| 57 |                            |                      |                                                                                                                                                                                                                                                                      |     |
| 58 |                            |                      |                                                                                                                                                                                                                                                                      |     |
| 59 |                            |                      |                                                                                                                                                                                                                                                                      |     |
| 60 |                            |                      |                                                                                                                                                                                                                                                                      |     |

## Results

|    |                   |                      |                                                                                                                                                                                                                                                                                |
|----|-------------------|----------------------|--------------------------------------------------------------------------------------------------------------------------------------------------------------------------------------------------------------------------------------------------------------------------------|
| 1  |                   |                      |                                                                                                                                                                                                                                                                                |
| 2  |                   |                      |                                                                                                                                                                                                                                                                                |
| 3  | Participants      | <a href="#">#13a</a> | Report numbers of individuals at each stage of study—eg numbers potentially eligible, examined for eligibility, confirmed eligible, included in the study, completing follow-up, and analysed. Give information separately for for exposed and unexposed groups if applicable. |
| 4  |                   |                      | "n/a. We did no select participants but used data from the German Socio-Economic Panel Study                                                                                                                                                                                   |
| 5  |                   |                      |                                                                                                                                                                                                                                                                                |
| 6  |                   |                      |                                                                                                                                                                                                                                                                                |
| 7  |                   |                      |                                                                                                                                                                                                                                                                                |
| 8  |                   |                      |                                                                                                                                                                                                                                                                                |
| 9  |                   |                      |                                                                                                                                                                                                                                                                                |
| 10 |                   |                      |                                                                                                                                                                                                                                                                                |
| 11 |                   |                      |                                                                                                                                                                                                                                                                                |
| 12 |                   |                      |                                                                                                                                                                                                                                                                                |
| 13 | Participants      | <a href="#">#13b</a> | Give reasons for non-participation at each stage                                                                                                                                                                                                                               |
| 14 |                   |                      | "n/a, see above"                                                                                                                                                                                                                                                               |
| 15 | Participants      | <a href="#">#13c</a> | Consider use of a flow diagram                                                                                                                                                                                                                                                 |
| 16 |                   |                      | "n/a, see above"                                                                                                                                                                                                                                                               |
| 17 |                   |                      |                                                                                                                                                                                                                                                                                |
| 18 | Descriptive data  | <a href="#">#14a</a> | Give characteristics of study participants (eg demographic, clinical, social) and information on exposures and potential confounders. Give information separately for exposed and unexposed groups if applicable.                                                              |
| 19 |                   |                      | 8                                                                                                                                                                                                                                                                              |
| 20 |                   |                      |                                                                                                                                                                                                                                                                                |
| 21 |                   |                      |                                                                                                                                                                                                                                                                                |
| 22 |                   |                      |                                                                                                                                                                                                                                                                                |
| 23 |                   |                      |                                                                                                                                                                                                                                                                                |
| 24 |                   |                      |                                                                                                                                                                                                                                                                                |
| 25 |                   |                      |                                                                                                                                                                                                                                                                                |
| 26 | Descriptive data  | <a href="#">#14b</a> | Indicate number of participants with missing data for each variable of interest                                                                                                                                                                                                |
| 27 |                   |                      | Table 1, p.21                                                                                                                                                                                                                                                                  |
| 28 |                   |                      |                                                                                                                                                                                                                                                                                |
| 29 |                   |                      |                                                                                                                                                                                                                                                                                |
| 30 | Outcome data      | <a href="#">#15</a>  | Report numbers of outcome events or summary measures. Give information separately for exposed and unexposed groups if applicable.                                                                                                                                              |
| 31 |                   |                      | Figure 1 and 2                                                                                                                                                                                                                                                                 |
| 32 |                   |                      |                                                                                                                                                                                                                                                                                |
| 33 |                   |                      |                                                                                                                                                                                                                                                                                |
| 34 |                   |                      |                                                                                                                                                                                                                                                                                |
| 35 | Main results      | <a href="#">#16a</a> | Give unadjusted estimates and, if applicable, confounder-adjusted estimates and their precision (eg, 95% confidence interval). Make clear which confounders were adjusted for and why they were included                                                                       |
| 36 |                   |                      | p. 7; Tables 2-4; p.14                                                                                                                                                                                                                                                         |
| 37 |                   |                      |                                                                                                                                                                                                                                                                                |
| 38 |                   |                      |                                                                                                                                                                                                                                                                                |
| 39 |                   |                      |                                                                                                                                                                                                                                                                                |
| 40 |                   |                      |                                                                                                                                                                                                                                                                                |
| 41 |                   |                      |                                                                                                                                                                                                                                                                                |
| 42 |                   |                      |                                                                                                                                                                                                                                                                                |
| 43 | Main results      | <a href="#">#16b</a> | Report category boundaries when continuous variables were categorized                                                                                                                                                                                                          |
| 44 |                   |                      | 6                                                                                                                                                                                                                                                                              |
| 45 |                   |                      |                                                                                                                                                                                                                                                                                |
| 46 |                   |                      |                                                                                                                                                                                                                                                                                |
| 47 | Main results      | <a href="#">#16c</a> | If relevant, consider translating estimates of relative risk into absolute risk for a meaningful time period                                                                                                                                                                   |
| 48 |                   |                      | "n/a, see above"                                                                                                                                                                                                                                                               |
| 49 |                   |                      |                                                                                                                                                                                                                                                                                |
| 50 |                   |                      |                                                                                                                                                                                                                                                                                |
| 51 |                   |                      |                                                                                                                                                                                                                                                                                |
| 52 |                   |                      |                                                                                                                                                                                                                                                                                |
| 53 | Other analyses    | <a href="#">#17</a>  | Report other analyses done—e.g., analyses of subgroups and interactions, and sensitivity analyses                                                                                                                                                                              |
| 54 |                   |                      | 14                                                                                                                                                                                                                                                                             |
| 55 |                   |                      |                                                                                                                                                                                                                                                                                |
| 56 |                   |                      |                                                                                                                                                                                                                                                                                |
| 57 |                   |                      |                                                                                                                                                                                                                                                                                |
| 58 | <b>Discussion</b> |                      |                                                                                                                                                                                                                                                                                |
| 59 |                   |                      |                                                                                                                                                                                                                                                                                |
| 60 |                   |                      |                                                                                                                                                                                                                                                                                |

|    |                    |                     |                                                                                                                                                                  |       |
|----|--------------------|---------------------|------------------------------------------------------------------------------------------------------------------------------------------------------------------|-------|
| 1  | Key results        | <a href="#">#18</a> | Summarise key results with reference to study objectives                                                                                                         | 10    |
| 2  |                    |                     |                                                                                                                                                                  |       |
| 3  |                    |                     |                                                                                                                                                                  |       |
| 4  | Limitations        | <a href="#">#19</a> | Discuss limitations of the study, taking into account sources of potential bias or imprecision. Discuss both direction and magnitude of any potential bias.      | 13    |
| 5  |                    |                     |                                                                                                                                                                  |       |
| 6  |                    |                     |                                                                                                                                                                  |       |
| 7  |                    |                     |                                                                                                                                                                  |       |
| 8  |                    |                     |                                                                                                                                                                  |       |
| 9  |                    |                     |                                                                                                                                                                  |       |
| 10 |                    |                     |                                                                                                                                                                  |       |
| 11 | Interpretation     | <a href="#">#20</a> | Give a cautious overall interpretation considering objectives, limitations, multiplicity of analyses, results from similar studies, and other relevant evidence. | 11-13 |
| 12 |                    |                     |                                                                                                                                                                  |       |
| 13 |                    |                     |                                                                                                                                                                  |       |
| 14 |                    |                     |                                                                                                                                                                  |       |
| 15 |                    |                     |                                                                                                                                                                  |       |
| 16 |                    |                     |                                                                                                                                                                  |       |
| 17 |                    |                     |                                                                                                                                                                  |       |
| 18 | Generalisability   | <a href="#">#21</a> | Discuss the generalisability (external validity) of the study results                                                                                            | 14    |
| 19 |                    |                     |                                                                                                                                                                  |       |
| 20 |                    |                     |                                                                                                                                                                  |       |
| 21 |                    |                     |                                                                                                                                                                  |       |
| 22 | <b>Other</b>       |                     |                                                                                                                                                                  |       |
| 23 | <b>Information</b> |                     |                                                                                                                                                                  |       |
| 24 |                    |                     |                                                                                                                                                                  |       |
| 25 |                    |                     |                                                                                                                                                                  |       |
| 26 | Funding            | <a href="#">#22</a> | Give the source of funding and the role of the funders for the present study and, if applicable, for the original study on which the present article is based    | 15    |
| 27 |                    |                     |                                                                                                                                                                  |       |
| 28 |                    |                     |                                                                                                                                                                  |       |
| 29 |                    |                     |                                                                                                                                                                  |       |
| 30 |                    |                     |                                                                                                                                                                  |       |
| 31 |                    |                     |                                                                                                                                                                  |       |
| 32 |                    |                     |                                                                                                                                                                  |       |

#### Notes:

- 35 • 13a: "n/a. We did not select participants but used data from the German Socio-Economic Panel Study
- 36
- 37
- 38
- 39 • 13b: "n/a, see above"
- 40
- 41 • 13c: "n/a, see above"
- 42
- 43
- 44 • 16c: "n/a, see above"
- 45
- 46 • The STROBE checklist is distributed under the terms of the Creative Commons Attribution License CC-BY. This checklist was completed on 18. June 2020 using
- 47
- 48 <https://www.goodreports.org/>, a tool made by the [EQUATOR Network](#) in collaboration with
- 49
- 50 [Penelope.ai](#)
- 51
- 52
- 53
- 54
- 55
- 56
- 57
- 58
- 59
